# Supplementary material for: Comparative Analysis of CRISPR-Cas Systems in Pseudomonas Genomes
Source: MDPI journal article supplement (doi:10.3390/genes14071337), 2023-06-25
Supplement: s1 [file s1]

TABLE S1. Overview of CRISPR-Cas systems in *Pseudomonas* genomes

| Species<br>(Strain)   | Access<br>number | CRISPR<br>number | loci CRISPR              |         |         |                  |                       |              |                   |                                  | Type of<br>CRISPR | Number of<br>genes <i>cas</i> | Origin of the Strain                       | Reference              |
|-----------------------|------------------|------------------|--------------------------|---------|---------|------------------|-----------------------|--------------|-------------------|----------------------------------|-------------------|-------------------------------|--------------------------------------------|------------------------|
|                       |                  |                  | CRISPR<br>length<br>(pb) | Start   | End     | Spacer<br>number | Spacer<br>length (pb) | DR<br>number | DR<br>length (pb) | DR<br>Consensus                  |                   |                               |                                            |                        |
| <i>Pa.</i> UCBPP-PA14 | NC_008463.1      | 2                | 873                      | 2926520 | 2927393 | 14               | 32 - 38               | 15           | 28                | GTTCACTGCCGTATAGGCAGCTAAGAAA     | I-F               | 6                             | Clinical isolate .<br>Massachusetts, USA   | Lee et al., 2006       |
|                       |                  |                  | 1288                     | 2935917 | 2937205 | 21               | 32 - 33               | 22           | 28                | TTTCTTAGCTGCCTACACGGCAGTGAAC     |                   |                               |                                            |                        |
| <i>Pa.</i> M18        | NC_017548.1      | 3                | 987                      | 1542032 | 1543019 | 16               | 32                    | 17           | 28                | GTTCACTGCCGTATAGGCAGCTAAGAAA     | I-F               | 6                             | Sweet melon rizosphere.<br>Shanghai, China | Wu et al., 2011        |
|                       |                  |                  | 866                      | 2878171 | 2879037 | 14               | 32 - 34               | 15           | 28                | GTTCACTGCCGTATAGGCAGCTAAGAAA     |                   |                               |                                            |                        |
|                       |                  |                  | 687                      | 2887565 | 2888252 | 11               | 32                    | 12           | 28                | TTTCTTAGCTGCCTACACGGCAGTGAAC     |                   |                               |                                            |                        |
| <i>Pa.</i> DK2        | NC_018080.1      | 3                | 687                      | 1398760 | 1399447 | 11               | 32                    | 12           | 28                | GTTCACTGCCGTATAGGCAGCTAAGAAA     | I-F               | 6                             | Clinical isolate . Denmark                 | Rau et al., 2012       |
|                       |                  |                  | 568                      | 2794688 | 2795256 | 9                | 32 - 33               | 10           | 28                | GTTCACTGCCGTATAGGCAGCTAAGAAA     |                   |                               |                                            |                        |
|                       |                  |                  | 987                      | 2803781 | 2804768 | 16               | 32                    | 17           | 28                | TTTCTTAGCTGCCTACACGGCAGTGAAC     |                   |                               |                                            |                        |
| <i>Pa.</i> SJTD-1     | NZ_CP015877.1    | 3                | 389                      | 4466205 | 4466594 | 6                | 32 - 33               | 7            | 28                | GTTCACTGCCGTGTAGGCAGCTAAGAAA     | I-F               | 6                             | Contaminated oil. Shanghai,<br>China       | Liu et al., 2012       |
|                       |                  |                  | 807                      | 4475118 | 4475925 | 13               | 32                    | 14           | 28                | TTTCTTAGCTGCCTATACGGCAGTGAAC     |                   |                               |                                            |                        |
|                       |                  |                  | 926                      | 5782574 | 5783500 | 15               | 30 - 33               | 16           | 28                | TTTCTTAGCTGCCTATACGGCAGTGAAC     |                   |                               |                                            |                        |
| <i>Pa.</i> RP73       | NC_021577.1      | 2                | 1310                     | 1409002 | 1410312 | 21               | 32 - 33               | 22           | 29                | GTGTTCCCCACGGGTGTGGGGATGAACCG    | I-E               | 8                             | Clinical isolate . Milán, Italy            | Jeukens et al., 2013   |
|                       |                  |                  | 1431                     | 1419483 | 1420914 | 23               | 32                    | 24           | 29                | GTGTTCCCCACATGCGTGGGGATGAACCG    |                   |                               |                                            |                        |
| <i>Pa.</i> DHS01      | NZ_CP013993.1    | 2                | 761                      | 4600982 | 4601743 | 12               | 32 - 33               | 13           | 29                | CGGTTTCATCCCCACGCATGTGGGGAACAC   | I-E               | 8                             | Clinical isolate . France                  | Valot et al., 2014     |
|                       |                  |                  | 517                      | 4610976 | 4611493 | 8                | 32 - 33               | 9            | 29                | CGGTTTCATCCCCACACCGTGGGGAACAC    |                   |                               |                                            |                        |
| <i>Pa.</i> SCV20265   | NC_023149.1      | 2                | 747                      | 1553838 | 1554585 | 12               | 32                    | 13           | 28                | GTTCACTGCCGTATAGGCAGCTAAGAAA     | I-F               | 6                             | Clinical isolate . Germany                 | Eckweiler et al., 2014 |
|                       |                  |                  | 1226                     | 3042757 | 3043983 | 20               | 31 - 32               | 21           | 28                | TTTCTTAGCTGCCTACACGGCAGTGAAC     |                   |                               |                                            |                        |
| <i>Pa.</i> YL84       | NZ_CP007147.1    | 2                | 628                      | 4416983 | 4417611 | 10               | 32 - 33               | 11           | 28                | GTTCACTGCCGTGTAGGCAGCTAAGAAA     | I-F               | 6                             | Compost. Kuala Lumpur.<br>Malaysia         | Chan et al., 2014      |
|                       |                  |                  | 509                      | 5703185 | 5703694 | 8                | 30                    | 9            | 30                | TTTCTTAGCTGCCTATACGGCAGTGAACGA   |                   |                               |                                            |                        |
| <i>Pa.</i> DSM 50071  | NZ_CP012001.1    | 3                | 807                      | 1484680 | 1485487 | 13               | 32                    | 14           | 28                | GTTCACTGCCGTATAGGCAGCTAAGAAA     | I-F               | 6                             | Clinical isolate . Okinawa,<br>Japan       | Nakano et al., 2015    |
|                       |                  |                  | 1047                     | 2773971 | 2775018 | 17               | 31 - 33               | 18           | 28                | GTTCACTGCCGTATAGGCAGCTAAGAAA     |                   |                               |                                            |                        |
|                       |                  |                  | 927                      | 2783544 | 2784471 | 15               | 32                    | 16           | 28                | TTTCTTAGCTGCCTACACGGCAGTGAAC     |                   |                               |                                            |                        |
| <i>Pa.</i> VA-134     | NZ_CP013245.1    | 3                | 889                      | 3476459 | 3477348 | 13               | 33 - 36               | 14           | 32                | GTCGCGCCCCGCACGGGCGCGTGGATTGAAAC | I-C / I-F         | 7 / 6                         | Clinical isolate .<br>Massachusetts, USA   | Miller et al., 2016    |
|                       |                  |                  | 567                      | 5802543 | 5803110 | 9                | 32                    | 10           | 28                | GTTCACTGCCGTGTAGGCAGCTAAGAAA     |                   |                               |                                            |                        |
|                       |                  |                  | 1106                     | 5811635 | 5812741 | 18               | 31 - 32               | 19           | 28                | TTTCTTAGCTGCCTATACGGCAGTGAAC     |                   |                               |                                            |                        |
| <i>Pa.</i> NCTC10332  | NZ_LN831024.1    | 3                | 807                      | 1484173 | 1484980 | 13               | 32                    | 14           | 28                | GTTCACTGCCGTATAGGCAGCTAAGAAA     | I-F               | 6                             | Clinical isolate                           | Irvine et al., 2019    |
|                       |                  |                  | 1047                     | 2773438 | 2774485 | 17               | 31 - 33               | 18           | 28                | GTTCACTGCCGTATAGGCAGCTAAGAAA     |                   |                               |                                            |                        |
|                       |                  |                  | 927                      | 2783010 | 2783937 | 15               | 32                    | 16           | 28                | TTTCTTAGCTGCCTACACGGCAGTGAAC     |                   |                               |                                            |                        |
| <i>Pa.</i> W16407     | NZ_CP008869.2    | 2                | 1227                     | 3076220 | 3077447 | 20               | 32                    | 21           | 28                | GTTCACTGCCGTATAGGCAGCTAAGAAA     | I-F               | 6                             | MSKCC. Nueva York, USA                     | Yan et al., 2017       |
|                       |                  |                  | 1587                     | 3085972 | 3087559 | 26               | 32                    | 27           | 28                | TTTCTTAGCTGCCTACACGGCAGTGAAC     |                   |                               |                                            |                        |

|                     |               |   |      |         |         |    |         |    |    |                                  |           |       |                        |                      |
|---------------------|---------------|---|------|---------|---------|----|---------|----|----|----------------------------------|-----------|-------|------------------------|----------------------|
| <i>Pa.</i> W36662   | NZ_CP008870.2 | 3 | 748  | 1697192 | 1697940 | 12 | 32 - 33 | 13 | 28 | GTTCACTGCCGTATAGGCAGCTAAGAAA     | I-F       | 6     | MSKCC. Nueva York, USA | Yan et al., 2017     |
|                     |               |   | 567  | 3229320 | 3229887 | 9  | 32      | 10 | 28 | GTTCACTGCCGTAGGCAGCTAAGAAA       |           |       |                        |                      |
|                     |               |   | 1166 | 3238753 | 3239919 | 19 | 31 - 33 | 20 | 28 | TTTCTTAGCTGCCTATACGGCAGTGAAC     |           |       |                        |                      |
| <i>Pa.</i> F23197   | NZ_CP008856.2 | 3 | 1169 | 1512098 | 1513267 | 19 | 32 - 33 | 20 | 28 | GTTCACTGCCGTACAGGCAGCTAAGAAA     | I-F       | 6     | MSKCC. Nueva York, USA | Yan et al., 2017     |
|                     |               |   | 928  | 2845847 | 2846775 | 15 | 32 - 33 | 16 | 28 | GTTCACTGCCGTACAGGCAGCTAAGAAA     |           |       |                        |                      |
|                     |               |   | 1770 | 2855424 | 2857194 | 29 | 31 - 32 | 30 | 29 | ATTTCTTAGCTGCCTACACGGCAGTGAAC    |           |       |                        |                      |
| <i>Pa.</i> H27930   | NZ_CP008860.2 | 2 | 807  | 1543749 | 1544556 | 13 | 32      | 14 | 28 | GTTCACTGCCGTATAGGCAGCTAAGAAA     | I-F       | 6     | MSKCC. Nueva York, USA | Yan et al., 2017     |
|                     |               |   | 1830 | 2891553 | 2893383 | 30 | 32 - 33 | 31 | 28 | TTTCTTAGCTGCCTACACGGCAGTGAAC     |           |       |                        |                      |
| <i>Pa.</i> M1608    | NZ_CP008862.2 | 2 | 1107 | 3435789 | 3436896 | 18 | 32      | 19 | 28 | GTTCACTGCCGTAGGCAGCTAAGAAA       | I-F       | 6     | MSKCC. Nueva York, USA | Yan et al., 2017     |
|                     |               |   | 803  | 3445420 | 3446233 | 13 | 34 - 38 | 14 | 28 | TTTCTTAGCTGCCTATACGGCAGTGAAC     |           |       |                        |                      |
| <i>Pa.</i> X78812   | NZ_CP008872.2 | 2 | 1168 | 1513945 | 1515113 | 19 | 32 - 33 | 20 | 28 | GTTCACTGCCGTACAGGCAGCTAAGAAA     | I-F       | 6     | MSKCC. Nueva York, USA | Yan et al., 2017     |
|                     |               |   | 1647 | 2818098 | 2819745 | 27 | 32      | 28 | 28 | TTTCTTAGCTGCCTACACGGCAGTGAAC     |           |       |                        |                      |
| <i>Pa.</i> NCGM257  | NZ_AP014651.1 | 2 | 928  | 3194113 | 3195041 | 15 | 31      | 16 | 29 | GTTCACTGCCGTATAGGCAGCTAAGAAAA    | I-F       | 6     | ND                     | -                    |
|                     |               |   | 1227 | 3203555 | 3204782 | 20 | 32      | 21 | 28 | TTTCTTAGCTGCCTACACGGCAGTGAAC     |           |       |                        |                      |
| <i>Pa.</i> F63912   | NZ_CP008858.2 | 2 | 1553 | 4349943 | 4351496 | 25 | 32      | 26 | 29 | CGGTTCATCCCCACGCATGTGGGGAACAC    | I-E       | 8     | MSKCC. Nueva York, USA | Yan et al., 2017     |
|                     |               |   | 1310 | 4360667 | 4361977 | 21 | 32 - 33 | 22 | 29 | CGGTTCATCCCCACACCCGTGGGGAACAC    |           |       |                        |                      |
| <i>Pa.</i> N17-1    | NZ_CP014948.1 | 1 | 1550 | 4503803 | 4505353 | 23 | 32 - 36 | 24 | 32 | GTTTCAATCCACGCGCCCGTGCGGGGCGCGAC | I-C       | 7     | Soils. Beijing, China  | Sangare et al., 2014 |
| <i>Pa.</i> PA121617 | NZ_CP016214.1 | 3 | 927  | 4744466 | 4745393 | 15 | 32      | 16 | 28 | GTTCACTGCCGTATAGGCAGCTAAGAAA     | I-F       | 6     | Clinical isolate       | Wang et al., 2017    |
|                     |               |   | 809  | 6110306 | 6111115 | 13 | 32 - 33 | 14 | 28 | GTTCACTGCCGTATAGGCAGCTAAGAAA     |           |       |                        |                      |
|                     |               |   | 1047 | 6121528 | 6122575 | 17 | 32      | 18 | 28 | TTTCTTAGCTGCCTACACGGCAGTGAAC     |           |       |                        |                      |
| <i>Pa.</i> PA_D1    | NZ_CP012585.1 | 2 | 1767 | 2933845 | 2935612 | 29 | 32      | 30 | 28 | GTTCACTGCCGTATAGGCAGCTAAGAAA     | I-F       | 6     | Clinical isolate       | Wang et al., 2017    |
|                     |               |   | 567  | 2944127 | 2944694 | 9  | 32      | 10 | 28 | TTTCTTAGCTGCCTACACGGCAGTGAAC     |           |       |                        |                      |
| <i>Pa.</i> PA_D9    | NZ_CP012580.1 | 2 | 1767 | 3517540 | 3519307 | 29 | 32      | 30 | 28 | GTTCACTGCCGTATAGGCAGCTAAGAAA     | I-F       | 6     | Clinical isolate       | Wang et al., 2017    |
|                     |               |   | 567  | 3527822 | 3528389 | 9  | 32      | 10 | 28 | TTTCTTAGCTGCCTACACGGCAGTGAAC     |           |       |                        |                      |
| <i>Pa.</i> PA_D25   | NZ_CP012584.1 | 2 | 1767 | 2935079 | 2936846 | 29 | 32      | 30 | 28 | GTTCACTGCCGTATAGGCAGCTAAGAAA     | I-F       | 6     | Clinical isolate       | Wang et al., 2017    |
|                     |               |   | 567  | 2945361 | 2945928 | 9  | 32      | 10 | 28 | TTTCTTAGCTGCCTACACGGCAGTGAAC     |           |       |                        |                      |
| <i>Pa.</i> PA_D5    | NZ_CP012579.1 | 2 | 1767 | 2933844 | 2935611 | 29 | 32      | 30 | 28 | GTTCACTGCCGTATAGGCAGCTAAGAAA     | I-F       | 6     | Clinical isolate       | Wang et al., 2017    |
|                     |               |   | 567  | 2944126 | 2944693 | 9  | 32      | 10 | 28 | TTTCTTAGCTGCCTACACGGCAGTGAAC     |           |       |                        |                      |
| <i>Pa.</i> PA1088   | NZ_CP015001.1 | 1 | 2619 | 5428082 | 5430701 | 39 | 33 - 38 | 40 | 32 | GTTTCAATCCACGCGCCCGTGCGGGGCGCGAC | I-C       | 7     | Clinical isolate       | Wang et al., 2017    |
| <i>Pa.</i> SCVFeb   | NZ_CP013477.1 | 4 | 922  | 2793712 | 2794634 | 15 | 29 - 32 | 16 | 28 | GTTCACTGCCGTATAGGCAGCTAAGAAA     | I-F / I-E | 6 / 8 | Clinical isolate       | Irvine et al., 2019  |
|                     |               |   | 1106 | 2803159 | 2804265 | 18 | 31 - 32 | 19 | 28 | TTTCTTAGCTGCCTACACGGCAGTGAAC     |           |       |                        |                      |
|                     |               |   | 1065 | 4112483 | 4113548 | 17 | 32      | 18 | 29 | CGGTTCATCCCCACGCATGTGGGGAACAC    |           |       |                        |                      |
|                     |               |   | 760  | 4122719 | 4123479 | 12 | 32      | 13 | 29 | CGGTTCATCCCCACACCCGTGGGGAACAC    |           |       |                        |                      |

|                                    |               |   |      |         |         |    |         |    |    |                                 |           |       |                            |                        |
|------------------------------------|---------------|---|------|---------|---------|----|---------|----|----|---------------------------------|-----------|-------|----------------------------|------------------------|
| <i>Pa.</i> Pa84                    | NZ_CP021999.1 | 2 | 1067 | 4328236 | 4329303 | 17 | 32 - 33 | 18 | 29 | CGGTTTCATCCCCACGCATGTGGGGAACAC  | I-E       | 8     | Clinical isolate           | Döbelmann et al., 2017 |
|                                    |               |   | 578  | 4338539 | 4339117 | 9  | 32 - 33 | 10 | 29 | CGGTTTCATCCCCACACCCGTGGGGAACAC  |           |       |                            |                        |
| <i>Pa.</i> PA83                    | NZ_CP017293.1 | 3 | 927  | 1564552 | 1565479 | 15 | 32      | 16 | 28 | GTTCACTGCCGTATAGGCAGCTAAGAAA    | I-F       | 6     | Clinical isolate           | Döbelmann et al., 2017 |
|                                    |               |   | 1404 | 3079377 | 3080781 | 23 | 28 - 33 | 24 | 28 | GTTCACTGCCGTATAGGCAGCTAAGAAA    |           |       |                            |                        |
|                                    |               |   | 1648 | 3089307 | 3090955 | 27 | 32 - 33 | 28 | 28 | TTTCTTAGCTGCCTACACGGCAGTGAAC    |           |       |                            |                        |
| <i>Pa.</i> L10                     | NZ_CP019338.1 | 2 | 813  | 2984027 | 2984840 | 13 | 32 - 38 | 14 | 28 | GTTCACTGCCGTATAGGCAGCTAAGAAA    | I-F       | 6     | Clinical isolate           | Döbelmann et al., 2017 |
|                                    |               |   | 1107 | 2993364 | 2994471 | 18 | 32      | 19 | 28 | TTTCTTAGCTGCCTACACGGCAGTGAAC    |           |       |                            |                        |
| <i>Pa.</i> 12939                   | NZ_CP024477.1 | 1 | 989  | 2841860 | 2842849 | 16 | 32 - 34 | 17 | 28 | TTTCTTAGCTGCCTACACGGCAGTGAAC    | I-F       | 6     | ND                         | -                      |
| <i>Pa.</i> PB368                   | NZ_CP025050.1 | 2 | 1677 | 3738498 | 3740175 | 27 | 32 - 33 | 28 | 29 | CGGTTTCATCCCCACGCAGTGGGGAACAC   | I-E       | 8     | ND                         | -                      |
|                                    |               |   | 1065 | 3749409 | 3750474 | 17 | 32      | 18 | 29 | CGGTTTCATCCCCACACCCGTGGGGAACAC  |           |       |                            |                        |
| <i>Pa.</i> F5677                   | NZ_CP026680.1 | 2 | 821  | 4332752 | 4333573 | 13 | 32      | 14 | 29 | CGGTTTCATCCCCACGCATGTGGGGAACAC  | I-E       | 8     | MSKCC. Nueva York, USA     | Yan et al., 2017       |
|                                    |               |   | 761  | 4342805 | 4343566 | 12 | 32 - 33 | 13 | 29 | CGGTTTCATCCCCACACCCGTGGGGAACAC  |           |       |                            |                        |
| <i>Pa.</i> AR_0360                 | NZ_CP027165.1 | 3 | 627  | 285926  | 286553  | 10 | 32      | 11 | 28 | GTTCACTGCCGTATAGGCAGCTAAGAAA    | I-F       | 6     | ND                         | -                      |
|                                    |               |   | 743  | 1651898 | 1652641 | 12 | 28 - 32 | 13 | 28 | GTTCACTGCCGTATAGGCAGCTAAGAAA    |           |       |                            |                        |
|                                    |               |   | 1408 | 1661167 | 1662575 | 23 | 32 - 33 | 24 | 28 | TTTCTTAGCTGCCTACACGGCAGTGAAC    |           |       |                            |                        |
| <i>Pa.</i> AR444                   | NZ_CP029089.1 | 3 | 1588 | 2281839 | 2283427 | 26 | 32 - 33 | 27 | 28 | GTTCACTGCCGTGTAGGCAGCTAAGAAA    | I-F       | 6     | ND                         | -                      |
|                                    |               |   | 1404 | 2291953 | 2293357 | 23 | 28 - 33 | 24 | 28 | TTTCTTAGCTGCCTATACGGCAGTGAAC    |           |       |                            |                        |
|                                    |               |   | 927  | 3805927 | 3806854 | 15 | 32      | 16 | 28 | TTTCTTAGCTGCCTATACGGCAGTGAAC    |           |       |                            |                        |
| <i>Pa.</i> DK1 substr.<br>NH57388A | NZ_LN870292.1 | 4 | 922  | 2795174 | 2796096 | 15 | 29 - 32 | 16 | 28 | GTTCACTGCCGTATAGGCAGCTAAGAAA    | I-F / I-E | 6 / 8 | Clinical isolate . Denmark | Norman et al., 2016    |
|                                    |               |   | 1106 | 2804621 | 2805727 | 18 | 31 - 32 | 19 | 28 | TTTCTTAGCTGCCTACACGGCAGTGAAC    |           |       |                            |                        |
|                                    |               |   | 1065 | 4113945 | 4115010 | 17 | 32      | 18 | 29 | CGGTTTCATCCCCACGCATGTGGGGAACAC  |           |       |                            |                        |
|                                    |               |   | 760  | 4124181 | 4124941 | 12 | 32      | 13 | 29 | CGGTTTCATCCCCACACCCGTGGGGAACAC  |           |       |                            |                        |
| <i>Pa.</i> SCVJan                  | NZ_CP013478.1 | 4 | 922  | 2793712 | 2794634 | 15 | 29 - 32 | 16 | 28 | GTTCACTGCCGTATAGGCAGCTAAGAAA    | I-F / I-E | 6 / 8 | Clinical isolate           | Irvine et al., 2019    |
|                                    |               |   | 1106 | 2803159 | 2804265 | 18 | 31 - 32 | 19 | 28 | TTTCTTAGCTGCCTACACGGCAGTGAAC    |           |       |                            |                        |
|                                    |               |   | 1065 | 4112486 | 4113551 | 17 | 32      | 18 | 29 | CGGTTTCATCCCCACGCATGTGGGGAACAC  |           |       |                            |                        |
|                                    |               |   | 760  | 4122722 | 4123482 | 12 | 32      | 13 | 29 | CGGTTTCATCCCCACACCCGTGGGGAACAC  |           |       |                            |                        |
| <i>Pa.</i> Nhmuc                   | NZ_CP013479.1 | 4 | 760  | 1812040 | 1812800 | 12 | 32      | 13 | 29 | CGGTTTCATCCCCACACCCGTGGGGAACAC  | I-E / I-F | 8 / 6 | Clinical isolate           | Irvine et al., 2019    |
|                                    |               |   | 1065 | 1821971 | 1823036 | 17 | 32      | 18 | 29 | CGGTTTCATCCCCACGCATGTGGGGAACAC  |           |       |                            |                        |
|                                    |               |   | 922  | 2793712 | 2794634 | 15 | 29 - 32 | 16 | 28 | GTTCACTGCCGTATAGGCAGCTAAGAAA    |           |       |                            |                        |
|                                    |               |   | 1106 | 3131254 | 3132360 | 18 | 31 - 32 | 19 | 28 | TTTCTTAGCTGCCTACACGGCAGTGAAC    |           |       |                            |                        |
| <i>Pa.</i> RW109                   | NZ_LT969520.1 | 2 | 638  | 4575011 | 4575649 | 10 | 32      | 11 | 29 | CGGTTTCATCCCCACGCATGTGGGGAACAC  | I-E       | 8     | Industrial isolate         | Green et al., 2018     |
|                                    |               |   | 761  | 4584881 | 4585642 | 12 | 32 - 33 | 13 | 29 | CGGTTTCATCCCCACACCCGTGGGGAACAC  |           |       |                            |                        |
| <i>Pp.</i> KF715                   | NZ_AP015029.1 | 1 | 518  | 113760  | 114278  | 8  | 32 - 33 | 9  | 28 | CCGCTCACCCCGCGCACGCGGGAATAC     | IV        | 5     | Soils. AIST, Japan         | Furukawa et al., 1986  |
| <i>Ps.</i> A1501                   | NC_009434.1   | 1 | 2823 | 4056654 | 4059477 | 42 | 33 - 38 | 43 | 32 | GTCGCGCCCCACGCGGCGCGTGGATTGAAAC | I-C       | 7     | Rizosphere. Beijing, China | Yan et al., 2008       |

|               |               |   |      |         |         |    |         |    |    |                                |           |       |                     |                        |
|---------------|---------------|---|------|---------|---------|----|---------|----|----|--------------------------------|-----------|-------|---------------------|------------------------|
| Pc. JD37      | NZ_CP009290.1 | 2 | 567  | 1346863 | 1347430 | 9  | 32      | 10 | 28 | TTTCTAAGCTGCCTACACGGCAGTGAAG   | I-F       | 6     | Soils               | Morohoshi et al., 2017 |
|               |               |   | 388  | 5675857 | 5676245 | 6  | 31      | 7  | 28 | TTTTCTAAGCTGCCTATTCGGCAGTGAAC  |           |       |                     |                        |
| Pm. Ymp       | NC_009439.1   | 2 | 2351 | 4137496 | 4139847 | 38 | 31 - 33 | 39 | 29 | CGGTTTCATCCCCGCTGGCGCGGGGAACAC | I-E       | 8     | Soils. Taiwan       | Kao et al., 2005       |
|               |               |   | 1005 | 4149157 | 4150162 | 16 | 32 - 33 | 17 | 29 | CGGTTTCATCCCCGCTGGCGCGGGGAACAC |           |       |                     |                        |
| Pps. CECT5344 | NZ_HG916826.1 | 4 | 2349 | 830038  | 832387  | 38 | 32 - 33 | 39 | 29 | GTGTTCCCCGCGCCAGCGGGGATGAACCG  | I-E / I-F | 8 / 6 | Guadalquir river    | Garrido et al., 2018   |
|               |               |   | 3567 | 842637  | 846204  | 58 | 32 - 33 | 59 | 29 | GTGTTCCCCGCGCCAGCGGGGATGAACCG  |           |       |                     |                        |
|               |               |   | 2608 | 4439047 | 4441655 | 43 | 32 - 33 | 44 | 28 | CTTCACTGCCGTGTAGGCAGCTCAGAAA   |           |       |                     |                        |
|               |               |   | 2067 | 4455183 | 4457250 | 34 | 32      | 35 | 28 | GTTCACTGCCGTGTAGGCAGCTCAGAAA   |           |       |                     |                        |
| Pal. JAB1     | NZ_CP016162.1 | 2 | 807  | 5187599 | 5188406 | 13 | 32      | 14 | 28 | CTTCACTGCCGAGTAGGCAGCTCAGAGA   | I-F       | 6     | Soils. Japan        | -                      |
|               |               |   | 1168 | 5199361 | 5200529 | 19 | 32 - 33 | 20 | 28 | GTTCACTGCCGTGTAGGCAGCTCAGAAA   |           |       |                     |                        |
| Pb. DSM6083   | NZ_CP007511.1 | 2 | 4179 | 3797904 | 3802083 | 68 | 32 - 33 | 69 | 29 | CGGTTTCATCCCCGCGCCTGCGGGGAACGC | I-E       | 8     | Sewage water. Spain | Bennasar et al., 2016  |
|               |               |   | 333  | 3812113 | 3812446 | 5  | 32      | 6  | 29 | CGGTTTCATCCCCGCGCCTGCGGGGAACAC |           |       |                     |                        |
| Ppa. CRS01-1  | NZ_CP009747.1 | 2 | 929  | 221721  | 222650  | 15 | 32 - 33 | 16 | 28 | TTTCTGAGCTGCCTACACGGCAGTGAAC   | I-F       | 6     | Rice field          | Liu et al., 2015       |
|               |               |   | 2072 | 231406  | 233478  | 34 | 32 - 33 | 35 | 28 | GTTCACTGCCGTGTAGGCAGCTCAGAAA   |           |       |                     |                        |
| Pci. SJTE-3   | NZ_CP015878.1 | 2 | 810  | 204033  | 204843  | 13 | 31 - 32 | 14 | 29 | ATTTCCTAGCTGCCTACACGGCAGTGAAG  | I-F       | 6     | Sewage water. China | Zheng et al., 2016     |
|               |               |   | 386  | 213808  | 214194  | 6  | 33      | 7  | 27 | TTTCTTAGCTGCCTATACGGCAGTGAA    |           |       |                     |                        |

*Pa*, *Pp*, *Ps*, *Pc*, *Pm*, *Pps*, *Pal*, *Pb*, *Ppa* and *Pci* it is short for *Pseudomonas aeruginosa*, *putida*, *stutzeri*, *chlororaphis*, *mendocina*, *pseudoalcaligenes*, *alcaliphila*, *balearica*, *parafulva* and *citronellolis*, respectively. ND it is short for Undetermined.

**Table S2.** Thermodynamics of direct repetitions (DR).

| Species (Strain) | CRISPR                                | Sequence type                                           | Sequence DR (5'-3')                                     | ΔG (kcal/mol)                  | ΔH (kcal/mol)                | ΔS cal/(K·mol) | T <sub>m</sub> (°C) | MFE DR (kcal/mol) | DR Folding | MFE CRISPR (kcal/mol) |         |
|------------------|---------------------------------------|---------------------------------------------------------|---------------------------------------------------------|--------------------------------|------------------------------|----------------|---------------------|-------------------|------------|-----------------------|---------|
| Pa. UCBPP-PA14   | 1                                     | Consensus                                               | GTTCACTGCCGTATAGGCAGCTAAGAAA                            | -8.50                          | -96.80                       | -284.7         | 66.8                | -8.60             | 436        | -399.10               |         |
|                  |                                       | Variant                                                 | GTTCACTGCCGTATAGGCA <b>TAGGCAGCT</b>                    | -7.40                          | -59.10                       | -166.6         | 81.3                | -7.70             | 801        |                       |         |
|                  |                                       | Variant                                                 | <b>T</b> TTCACTGCC <b>AC</b> ATAGG <b>TCGTCA</b> AAGAAA | -4.70                          | -57.50                       | -170.2         | 64.6                | -2.70             | 762        |                       |         |
|                  | 2                                     | Consensus                                               | TTTCTTAGCTGCCTACACGGCAGTGAAC                            | -10.40                         | -68.80                       | -188.2         | 92.2                | -9.10             | 1084       | -557.80               |         |
| Pa. M18          | 1                                     | Consensus                                               | GTTCACTGCCGTATAGGCAGCTAAGAAA                            | -8.50                          | -96.80                       | -284.7         | 66.8                | -8.60             | 436        | -464.30               |         |
|                  | 2                                     | Consensus                                               | GTTCACTGCCGTATAGGCAGCTAAGAAA                            | -8.50                          | -96.80                       | -284.7         | 66.8                | -8.60             | 436        | -388.60               |         |
|                  |                                       | Variant                                                 | GTTCACTGCCGTATAGGCAGC <b>AAAAAAT</b>                    | -8.40                          | -59.10                       | -163.4         | 88.3                | -8.60             | 296        |                       |         |
|                  |                                       | Variant                                                 | <b>T</b> TTCACTGCC <b>AC</b> ATAGG <b>TCGTCA</b> AAGAAA | -4.70                          | -57.50                       | -170.2         | 64.6                | -2.70             | 762        |                       |         |
| Pa. DK2          | 3                                     | Consensus                                               | TTTCTTAGCTGCCTACACGGCAGTGAAC                            | -10.40                         | -68.80                       | -188.2         | 92.2                | -9.10             | 1084       | -339.60               |         |
|                  |                                       | 1                                                       | Consensus                                               | GTTCACTGCCGTATAGGCAGCTAAGAAA   | -8.50                        | -96.80         | -284.7              | 66.8              | -8.60      | 436                   | -362.30 |
|                  |                                       | 2                                                       | Consensus                                               | GTTCACTGCCGTATAGGCAGCTAAGAAA   | -8.50                        | -96.80         | -284.7              | 66.8              | -8.60      | 436                   | -277.90 |
|                  | Variant                               | <b>T</b> TTCACTGCC <b>AC</b> ATAGG <b>TCGTCA</b> AAGAAA | -4.70                                                   | -57.50                         | -170.2                       | 64.6           | -2.70               | 762               |            |                       |         |
| Pa. SJTD-1       | 3                                     | Consensus                                               | TTTCTTAGCTGCCTACACGGCAGTGAAC                            | -10.40                         | -68.80                       | -188.2         | 92.2                | -9.10             | 1084       | -437.30               |         |
|                  |                                       | 1                                                       | Consensus                                               | GTTCACTGCCGTGTAGGCAGCTAAGAAA   | -8.50                        | -96.80         | -284.7              | 66.8              | -8.60      | 695                   | -198.20 |
|                  |                                       | 2                                                       | Consensus                                               | TTTCTTAGCTGCCTATACGGCAGTGAAC   | -10.40                       | -68.80         | -188.2              | 92.2              | -9.10      | 1117                  | -352.30 |
|                  | Variant                               | TTTCTT <b>GACGAC</b> CTAT <b>GT</b> GGCAGTGAA <b>A</b>  | -2.20                                                   | -53.40                         | -165                         | 50.3           | -4.40               | 1535              |            |                       |         |
| Variant          | TTTT <b>TTT</b> GCTGCCTATACGGCAGTGAAC | -11.90                                                  | -78.60                                                  | -215                           | 92.3                         | -11.20         | 2020                |                   |            |                       |         |
| Pa. RP73         | 3                                     | Consensus                                               | TTTCTTAGCTGCCTATACGGCAGTGAAC                            | -10.40                         | -68.80                       | -188.2         | 92.2                | -9.10             | 1117       | -421.10               |         |
|                  |                                       | 1                                                       | Consensus                                               | GTGTTCCCCACGGGTGTGGGGATGAACCG  | -13.40                       | -101.40        | -283.7              | 84.2              | -12.90     | 4020                  | -747.80 |
|                  |                                       | Variant                                                 | <b>A</b> TGTTCCCCAC <b>AGGCG</b> TGGG <b>ATAAACTG</b>   | -8.20                          | -62.00                       | -173.4         | 84.2                | -8.30             | 1512       |                       |         |
|                  | 2                                     | Consensus                                               | GTGTTCCCCACATGCGTGGGGATGAACCG                           | -13.50                         | -101.50                      | -283.7         | 84.5                | -12.90            | 2194       | -764.50               |         |
| Variant          |                                       | GTGTTCCCCACATGCGTGGGGATGAAC <b>C</b> A                  | -13.50                                                  | -101.50                        | -283.7                       | 84.5           | -12.90              | 2168              |            |                       |         |
| Variant          |                                       | GTGTTCCCCACATGCGTGGGGATGAAC <b>CC</b>                   | -13.50                                                  | -101.50                        | -283.7                       | 84.5           | -12.90              | 1715              |            |                       |         |
| Pa. DHS01        | 1                                     | Consensus                                               | CGGTTTCATCCCCACGCATGTGGGGAACAC                          | -13.00                         | -85.40                       | -233.4         | 92.6                | -12.80            | 1133       | -419.30               |         |
|                  |                                       | Variant                                                 | <b>T</b> GGTTTCATCCCCACGCATGTGGGGAACAC                  | -13.00                         | -85.40                       | -233.4         | 92.6                | -12.80            | 1773       |                       |         |
|                  |                                       | 2                                                       | Consensus                                               | CGGTTTCATCCCCACACCCGTGGGGAACAC | -13.10                       | -85.50         | -233.4              | 93.1              | -12.80     | 1002                  | -332.50 |
|                  | Pa. SCV20265                          | 1                                                       | Consensus                                               | GTTCACTGCCGTATAGGCAGCTAAGAAA   | -8.50                        | -96.80         | -284.7              | 66.8              | -8.60      | 436                   | -365.20 |
| Variant          |                                       |                                                         | GTTCACTGCCGTATAGG <b>T</b> AGCTAAGAAA                   | -6.20                          | -85.80                       | -256.6         | 61.1                | -6.60             | 511        |                       |         |
| 2                |                                       | Consensus                                               | TTTCTTAGCTGCCTACACGGCAGTGAAC                            | -10.40                         | -68.80                       | -188.2         | 92.2                | -9.10             | 1084       | -508.60               |         |
|                  |                                       | Pa. YL84                                                | 1                                                       | Consensus                      | GTTCACTGCCGTGTAGGCAGCTAAGAAA | -8.50          | -96.80              | -284.7            | 66.8       | -8.60                 | 695     |
| Variant          | <b>AC</b> ACACTGCCGTGTAGGCAGCTAAGAAA  |                                                         |                                                         | -8.40                          | -59.10                       | -163.4         | 88.3                | -8.60             | 141        |                       |         |
| Variant          | GTTCACTGCCGTG <b>C</b> AGGCAGCTAAGAAA |                                                         |                                                         | -8.50                          | -96.80                       | -284.7         | 66.8                | -8.60             | 590        |                       |         |
| 2                | Consensus                             |                                                         | TTTCTTAGCTGCCTATACGGCAGTGAACGA                          | -10.40                         | -68.80                       | -188.2         | 92.2                | -9.10             | 2082       | -258.00               |         |
|                  | Variant                               |                                                         | TTTCTTAGCTGCCTATACGGCAGTGAAC <b>CC</b>                  | -10.40                         | -68.80                       | -188.2         | 92.2                | -9.10             | 1137       |                       |         |
|                  | Variant                               |                                                         | TTTCTTAGCTGCCTATACGGCAGTGAACG <b>C</b>                  | -10.40                         | -68.80                       | -188.2         | 92.2                | -9.10             | 1305       |                       |         |
|                  | Variant                               |                                                         | TTTCTTAGCTGCCTATACGGCAGTGAAC <b>T</b> A                 | -10.40                         | -68.80                       | -188.2         | 92.2                | -9.10             | 1565       |                       |         |
|                  | Variant                               |                                                         | TTTCTTAGCTGCCTATACGGCAGTGAAC <b>TG</b>                  | -10.40                         | -68.80                       | -188.2         | 92.2                | -9.10             | 1689       |                       |         |
| Pa. DSM 50071    | 1                                     | Consensus                                               | GTTCACTGCCGTATAGGCAGCTAAGAAA                            | -8.50                          | -96.80                       | -284.7         | 66.8                | -8.60             | 436        | -398.40               |         |
|                  |                                       | 2                                                       | Consensus                                               | GTTCACTGCCGTATAGGCAGCTAAGAAA   | -8.50                        | -96.80         | -284.7              | 66.8              | -8.60      | 436                   | -462.10 |
|                  | 3                                     | Variant                                                 | GTTCACTGCCGTATAGGCAGC <b>AAAAAAT</b>                    | -8.40                          | -59.10                       | -163.4         | 88.3                | -8.60             | 296        |                       |         |
|                  |                                       | Variant                                                 | <b>T</b> TTCACTGCC <b>AC</b> ATAGG <b>TCGTCA</b> AAGAAA | -4.70                          | -57.50                       | -170.2         | 64.6                | -2.70             | 762        |                       |         |
|                  |                                       | Consensus                                               | TTTCTTAGCTGCCTACACGGCAGTGAAC                            | -10.40                         | -68.80                       | -188.2         | 92.2                | -9.10             | 1084       | -423.20               |         |
| Pa. VA-134       | 1                                     | Consensus                                               | GTCGCGCCCCGCACGGGCGCGTGGATTGAAAC                        | -14.00                         | 78.30                        | -207.3         | 104.5               | -14.30            | 3610       | -488.10               |         |
|                  |                                       | Variant                                                 | GTCGCGCCCCGCAT <b>T</b> GGGCGCGTGGATTGAA <b>CA</b>      | -13.70                         | 80.50                        | -215.3         | 100.6               | -14.00            | 3921       |                       |         |
|                  |                                       | Variant                                                 | GTCGCGCC <b>CTACG</b> CGGGCGCGTGGAG <b>T</b> GAAAG      | -14.40                         | -81.20                       | -215.3         | 103.8               | -14.60            | 3298       |                       |         |

|                      |   |           |                                                                 |        |        |        |       |        |      |         |
|----------------------|---|-----------|-----------------------------------------------------------------|--------|--------|--------|-------|--------|------|---------|
|                      | 2 | Consensus | GTTCACTGCCGTGTAGGCAGCTAAGAAA                                    | -8.50  | -96.80 | -284.7 | 66.8  | -8.60  | 695  | -278.10 |
|                      | 3 | Consensus | TTTCTTAGCTGCCTATACGGCAGTGAAC                                    | -10.40 | -68.80 | -188.2 | 92.2  | -9.10  | 1117 | -501.90 |
|                      |   | Variant   | TTTCTT <u>GACG</u> ACCTAT <u>GT</u> GGCAGTGA <u>AA</u>          | -2.20  | -53.40 | -165   | 50.3  | -4.40  | 1535 |         |
|                      |   | Variant   | TTT <u>TTT</u> GCTGCCTATACGGCAGTGAAC                            | -11.90 | -78.60 | -215   | 92.3  | -11.20 | 2020 |         |
| <b>Pa. NCTC10332</b> | 1 | Consensus | GTTCACTGCCGTATAGGCAGCTAAGAAA                                    | -8.50  | -96.80 | -284.7 | 66.8  | -8.60  | 436  | -398.40 |
|                      | 2 | Consensus | GTTCACTGCCGTATAGGCAGCTAAGAAA                                    | -8.50  | -96.80 | -284.7 | 66.8  | -8.60  | 436  | -462.10 |
|                      |   | Variant   | GTTCACTGCCGTATAGGCAGC <u>AAAAAAT</u>                            | -8.40  | -59.10 | -163.4 | 88.3  | -8.60  | 296  |         |
|                      |   | Variant   | <u>TTT</u> CACTGCC <u>AC</u> ATAGG <u>TCGT</u> CAAGAAA          | -4.70  | -57.50 | -170.2 | 64.6  | -2.70  | 762  |         |
|                      | 3 | Consensus | TTTCTTAGCTGCCTACACGGCAGTGAAC                                    | -10.40 | -68.80 | -188.2 | 92.2  | -9.10  | 1084 | -423.20 |
| <b>Pa. W16407</b>    | 1 | Consensus | GTTCACTGCCGTATAGGCAGCTAAGAAA                                    | -8.50  | -96.80 | -284.7 | 66.8  | -8.60  | 436  | -521.90 |
|                      |   | Variant   | GTTCACTGCCGTATAGGCAGC <u>CA</u> AGAAA                           | -8.50  | -96.80 | -284.7 | 66.8  | -8.60  | 342  |         |
|                      |   | Variant   | <u>TTT</u> CACTGCC <u>AC</u> ATAGG <u>TCGT</u> CAAGAAA          | -4.70  | -57.50 | -170.2 | 64.6  | -2.70  | 762  |         |
|                      | 2 | Consensus | TTTCTTAGCTGCCTACACGGCAGTGAAC                                    | -10.40 | -68.80 | -188.2 | 92.2  | -9.10  | 1084 | -699.70 |
|                      |   | Variant   | TTTCTTAGCTGCCTACT <u>TC</u> GGCAGTGAAC                          | -10.40 | -68.80 | -188.2 | 92.2  | -9.10  | 1054 |         |
| <b>Pa. W36662</b>    | 1 | Consensus | GTTCACTGCCGTATAGGCAGCTAAGAAA                                    | -8.50  | -96.80 | -284.7 | 66.8  | -8.60  | 436  | -363.30 |
|                      | 2 | Consensus | GTTCACTGCCGTGTAGGCAGCTAAGAAA                                    | -8.50  | -96.80 | -284.7 | 66.8  | -8.60  | 695  | -285.70 |
|                      | 3 | Consensus | TTTCTTAGCTGCCTATACGGCAGTGAAC                                    | -10.40 | -68.80 | -188.2 | 92.2  | -9.10  | 1117 | -533.10 |
|                      |   | Variant   | <u>ATTTT</u> TGCTGCCTATACGGCAGTGAAC                             | -11.90 | -78.60 | -215   | 92.3  | -11.20 | 1584 |         |
|                      |   | Variant   | TTTCTTAGCTGCCTATACGGT <u>AGT</u> GAAC                           | -8.10  | -57.80 | -160.2 | 87.5  | -7.10  | 1586 |         |
|                      |   | Variant   | TTTCTT <u>GACG</u> ACCTAT <u>GT</u> GGCAGTGA <u>AA</u>          | -2.20  | -53.40 | -165   | 50.3  | -4.40  | 1535 |         |
| <b>Pa. F23197</b>    | 1 | Consensus | GTTCACTGCCGTACAGGCAGCTAAGAAA                                    | -8.50  | -96.80 | -284.7 | 66.8  | -8.60  | 384  | -522.90 |
|                      |   | Variant   | GTTCACTGCCGTATAGGCAGCTAAGAAA                                    | -8.50  | -96.80 | -284.7 | 66.8  | -8.60  | 436  |         |
|                      | 2 | Consensus | GTTCACTGCCGTACAGGCAGCTAAGAAA                                    | -8.50  | -96.80 | -284.7 | 66.8  | -8.60  | 384  | -391.20 |
|                      |   | Variant   | GTTCACTGCCGTATAGGCAGCTAAGAAA                                    | -8.50  | -96.80 | -284.7 | 66.8  | -8.60  | 436  |         |
|                      | 3 | Consensus | ATTTCTTAGCTGCCTACACGGCAGTGAAC                                   | -10.40 | -68.80 | -188.2 | 92.2  | -9.10  | 1164 | -748.70 |
|                      |   | Variant   | <u>TTT</u> CTTAGCTGCCTACACGGCAGTGAAC                            | -10.40 | -68.80 | -188.2 | 92.2  | -9.10  | 1616 |         |
| <b>Pa. H27930</b>    | 1 | Consensus | GTTCACTGCCGTATAGGCAGCTAAGAAA                                    | -8.50  | -96.80 | -284.7 | 66.8  | -8.60  | 436  | -373.60 |
|                      | 2 | Consensus | TTTCTTAGCTGCCTACACGGCAGTGAAC                                    | -10.40 | -68.80 | -188.2 | 92.2  | -9.10  | 1084 | -801.60 |
|                      |   | Variant   | TTTCTTAGCTGCCTACACGGCAGGGAAC                                    | -9.20  | -86.00 | -247.6 | 74.1  | -8.50  | 1949 |         |
| <b>Pa. M1608</b>     | 1 | Consensus | GTTCACTGCCGTGTAGGCAGCTAAGAAA                                    | -8.50  | -96.80 | -284.7 | 66.8  | -8.60  | 695  | -482.70 |
|                      | 2 | Consensus | TTTCTTAGCTGCCTATACGGCAGTGAAC                                    | -10.40 | -68.80 | -188.2 | 92.2  | -9.10  | 1117 | 375.50  |
|                      |   | Variant   | <u>AGCTGCCTA</u> TGCCTATACGGCAGTGAAC                            | -9.40  | -68.80 | -191.5 | 86    | -8.80  | 469  |         |
|                      |   | Variant   | TTTCTT <u>GACG</u> ACCTAT <u>GT</u> GGCAGTGA <u>AA</u>          | -2.20  | -53.40 | -165   | 50.3  | -4.40  | 1535 |         |
| <b>Pa. X78812</b>    | 1 | Consensus | GTTCACTGCCGTACAGGCAGCTAAGAAA                                    | -8.50  | -96.80 | -284.7 | 66.8  | -8.60  | 384  | -512.50 |
|                      | 2 | Consensus | TTTCTTAGCTGCCTACACGGCAGTGAAC                                    | -10.40 | -68.80 | -188.2 | 92.2  | -9.10  | 1084 | -725.30 |
|                      |   | Variant   | TTTCTTAGCTGCCTACT <u>TC</u> GGCAGTGAAC                          | -10.40 | -68.80 | -188.2 | 92.2  | -9.10  | 1054 |         |
| <b>Pa. NCGM257</b>   | 1 | Consensus | GTTCACTGCCGTATAGGCAGCTAAGAAAA                                   | -8.50  | -96.80 | -284.7 | 66.8  | -8.60  | 490  | -428.00 |
|                      |   | Variant   | GTTCACTGCCGTATAGGCAGCTAA <u>AAAAAT</u>                          | -8.40  | -59.10 | -163.4 | 88.3  | -8.60  | 423  |         |
|                      |   | Variant   | GTTCACTGCCGTATAGGCAGCTAAGAA <u>AT</u>                           | -8.50  | -96.80 | -284.7 | 66.8  | -8.60  | 611  |         |
|                      |   | Variant   | GTTCACTGCCGTATAGGCAGCTAGGAA <u>AC</u>                           | -9.70  | -96.80 | -280.8 | 71.5  | -8.60  | 888  |         |
|                      |   | Variant   | <u>TTT</u> CACTGCC <u>AC</u> ATAGG <u>TCGT</u> CAAGAA <u>AC</u> | -4.70  | -57.50 | -170.2 | 64.6  | -3.10  | 800  |         |
|                      | 2 | Consensus | TTTCTTAGCTGCCTACACGGCAGTGAAC                                    | -10.40 | -68.80 | -188.2 | 92.2  | -9.10  | 1084 | -531.00 |
| <b>Pa. F63912</b>    | 1 | Consensus | CGGTTCATCCCCACGCATGTGGGGAACAC                                   | -13.00 | -85.40 | -233.4 | 92.6  | -12.80 | 1133 | -809.00 |
|                      |   | Variant   | <u>TGGT</u> TCATCCCCACGCATGTGGGGAACAC                           | -13.00 | -85.40 | -233.4 | 92.6  | -12.80 | 1773 |         |
|                      | 2 | Consensus | CGGTTCATCCCCACACCCGTGGGGAACAC                                   | -13.10 | -85.50 | -233.4 | 93.1  | -12.80 | 1002 | -731.70 |
|                      |   | Variant   | <u>CAG</u> TCATCCCCAC <u>G</u> CCCGTGGGGAACAC                   | -13.00 | -85.40 | -233.4 | 92.6  | -12.80 | 233  |         |
|                      |   | Variant   | <u>CAGGTTTAT</u> CCCAC <u>G</u> CCTGTGGGGAA <u>CAT</u>          | -9.70  | -90.20 | -259.5 | 74.3  | -9.30  | 1127 |         |
| <b>Pa. N17-1</b>     | 1 | Consensus | GTTTCAATCCACGCGCCCGTGCGGGGCGCGAC                                | -15.20 | -88.00 | -234.7 | 101.7 | -16.00 | 3767 | -806.50 |

|                     |   |           |                                                        |        |        |        |       |        |      |          |
|---------------------|---|-----------|--------------------------------------------------------|--------|--------|--------|-------|--------|------|----------|
|                     |   | Variant   | <u>CTT</u> CACTCCACGCGCCCG <u>CGT</u> AGGGCGCGAC       | -15.90 | -88.00 | -232.4 | 105.3 | -15.90 | 1251 |          |
| <b>Pa. PA121617</b> | 1 | Consensus | GTTCACTGCCGTATAGGCAGCTAAGAAA                           | -8.50  | -96.80 | -284.7 | 66.8  | -8.60  | 436  | -424.90  |
|                     | 2 | Consensus | GTTCACTGCCGTATAGGCAGCTAAGAAA                           | -8.50  | -96.80 | -284.7 | 66.8  | -8.60  | 436  | -366.60  |
|                     | 3 | Consensus | TTTCTTAGCTGCCTACACGGCAGTGAAC                           | -10.40 | -68.80 | -188.2 | 92.2  | -9.10  | 1084 | -468.60  |
| <b>Pa. PA_D1</b>    | 1 | Consensus | GTTCACTGCCGTATAGGCAGCTAAGAAA                           | -8.50  | -96.80 | -284.7 | 66.8  | -8.60  | 436  | -763.80  |
|                     |   | Variant   | <u>CTT</u> CACTGCCGTATAGGCAGCTAAGAAA                   | -8.80  | -84.50 | -244   | 73    | -10.00 | 478  |          |
|                     |   | Variant   | GTTCACTGCCGTATAGGCAGC <u>AAAA</u> AAAA                 | -8.40  | -59.10 | -163.4 | 88.3  | -8.60  | 258  |          |
|                     |   | Variant   | <u>TTT</u> CACTGCC <u>AC</u> ATAGG <u>TCGT</u> CAAGAAA | -4.70  | -57.50 | -170.2 | 64.6  | -2.70  | 762  |          |
|                     | 2 | Consensus | TTTCTTAGCTGCCTACACGGCAGTGAAC                           | -10.40 | -68.80 | -188.2 | 92.2  | -9.10  | 1084 | -291.80  |
| <b>Pa. PA_D9</b>    | 1 | Consensus | GTTCACTGCCGTATAGGCAGCTAAGAAA                           | -8.50  | -96.80 | -284.7 | 66.8  | -8.60  | 436  | -763.80  |
|                     |   | Variant   | <u>CTT</u> CACTGCCGTATAGGCAGCTAAGAAA                   | -8.80  | -84.50 | -244   | 73    | -10.00 | 478  |          |
|                     |   | Variant   | GTTCACTGCCGTATAGGCAGC <u>AAAA</u> AAAA                 | -8.40  | -59.10 | -163.4 | 88.3  | -8.60  | 258  |          |
|                     |   | Variant   | <u>TTT</u> CACTGCC <u>AC</u> ATAGG <u>TCGT</u> CAAGAAA | -4.70  | -57.50 | -170.2 | 64.6  | -2.70  | 762  |          |
|                     | 2 | Consensus | TTTCTTAGCTGCCTACACGGCAGTGAAC                           | -10.40 | -68.80 | -188.2 | 92.2  | -9.10  | 1084 | -291.80  |
| <b>Pa. PA_D25</b>   | 1 | Consensus | GTTCACTGCCGTATAGGCAGCTAAGAAA                           | -8.50  | -96.80 | -284.7 | 66.8  | -8.60  | 436  | -763.80  |
|                     |   | Variant   | <u>CTT</u> CACTGCCGTATAGGCAGCTAAGAAA                   | -8.80  | -84.50 | -244   | 73    | -10.00 | 478  |          |
|                     |   | Variant   | GTTCACTGCCGTATAGGCAGC <u>AAAA</u> AAAA                 | -8.40  | -59.10 | -163.4 | 88.3  | -8.60  | 258  |          |
|                     |   | Variant   | <u>TTT</u> CACTGCC <u>AC</u> ATAGG <u>TCGT</u> CAAGAAA | -4.70  | -57.50 | -170.2 | 64.6  | -2.70  | 762  |          |
|                     | 2 | Consensus | TTTCTTAGCTGCCTACACGGCAGTGAAC                           | -10.40 | -68.80 | -188.2 | 92.2  | -9.10  | 1084 | -291.80  |
| <b>Pa. PA_D5</b>    | 1 | Consensus | GTTCACTGCCGTATAGGCAGCTAAGAAA                           | -8.50  | -96.80 | -284.7 | 66.8  | -8.60  | 436  | -763.80  |
|                     |   | Variant   | <u>CTT</u> CACTGCCGTATAGGCAGCTAAGAAA                   | -8.80  | -84.50 | -244   | 73    | -10.00 | 478  |          |
|                     |   | Variant   | GTTCACTGCCGTATAGGCAGC <u>AAAA</u> AAAA                 | -8.40  | -59.10 | -163.4 | 88.3  | -8.60  | 258  |          |
|                     |   | Variant   | <u>TTT</u> CACTGCC <u>AC</u> ATAGG <u>TCGT</u> CAAGAAA | -4.70  | -57.50 | -170.2 | 64.6  | -2.70  | 762  |          |
|                     | 2 | Consensus | TTTCTTAGCTGCCTACACGGCAGTGAAC                           | -10.40 | -68.80 | -188.2 | 92.2  | -9.10  | 1084 | -291.80  |
| <b>Pa. PA1088</b>   | 1 | Consensus | GTTTCAATCCACGCGCCCGTGCGGGGCGCGAC                       | -15.20 | -88.00 | -234.7 | 101.7 | -16.00 | 3767 | -1308.50 |
|                     |   | Variant   | <u>CTT</u> CACTCCACGCGCCCGTGCGGGGCGCGAC                | -15.20 | -88.00 | -234.7 | 101.7 | -16.00 | 2379 |          |
| <b>Pa. SCVFeb</b>   | 1 | Consensus | GTTCACTGCCGTATAGGCAGCTAAGAAA                           | -8.50  | -96.80 | -284.7 | 66.8  | -8.60  | 436  | -368.90  |
|                     |   | Variant   | GTTCACTGCCGTATAGGCAGCTAA <u>AAAA</u>                   | -8.40  | -59.10 | -163.4 | 88.3  | -8.60  | 315  |          |
|                     |   | Variant   | <u>TTT</u> CACTGCC <u>AC</u> ATAGG <u>TCGT</u> CAAGAAA | -4.70  | -57.50 | -170.2 | 64.6  | -2.70  | 762  |          |
|                     | 2 | Consensus | TTTCTTAGCTGCCTACACGGCAGTGAAC                           | -10.40 | -68.80 | -188.2 | 92.2  | -9.10  | 1084 | -503.80  |
|                     |   | Variant   | TTTCTTAGCTGCCTACT <u>TC</u> GGCAGTGAAC                 | -10.40 | -68.80 | -188.2 | 92.2  | -9.10  | 1054 |          |
|                     | 3 | Consensus | CGGTTCATCCCCACGCATGTGGGGAACAC                          | -13.00 | -85.40 | -233.4 | 92.6  | -12.80 | 1133 | -564.60  |
|                     |   | Variant   | CGGTTCATCCCCACGCATGT <u>AG</u> GGGAACAC                | -7.50  | -62.70 | -177.9 | 79.1  | -6.20  | 435  |          |
|                     | 4 | Consensus | CGGTTCATCCCCACACCCGTGGGGAACAC                          | -13.10 | -85.50 | -233.4 | 93.1  | -12.80 | 1002 | -456.60  |
|                     |   | Variant   | <u>CAG</u> CTCATCCCCAC <u>G</u> CCCGTGGGGAACAC         | -13.00 | -85.40 | -233.4 | 92.6  | -12.80 | 233  |          |
|                     |   | Variant   | <u>CAGGTTTAT</u> CCCAC <u>G</u> CCTGTGGGGAACAT         | -9.70  | -90.20 | -259.5 | 74.3  | -9.30  | 1127 |          |
| <b>Pa. Pa84</b>     | 1 | Consensus | CGGTTCATCCCCACGCATGTGGGGAACAC                          | -13.00 | -85.40 | -233.4 | 92.6  | -12.80 | 1133 | -564.80  |
|                     |   | Variant   | <u>AGG</u> TTCATCCCCACGCATGTGGGGAACAC                  | -13.00 | -85.40 | -233.4 | 92.6  | -12.80 | 1112 |          |
|                     | 2 | Consensus | CGGTTCATCCCCACACCCGTGGGGAACAC                          | -13.10 | -85.50 | -233.4 | 93.1  | -12.80 | 1002 | -356.60  |
|                     |   | Variant   | <u>CAG</u> CTCATCCCCAC <u>G</u> CCCGTGGGGAACAC         | -13.00 | -85.40 | -233.4 | 92.6  | -12.80 | 233  |          |
|                     |   | Variant   | CGGTTCATCCCCACACCC <u>CGT</u> GGG <u>GAA</u> CA        | -13.60 | -85.50 | -231.8 | 95.6  | -12.70 | 1187 |          |
|                     |   | Variant   | CGGTTCATCCCCACACCCGTGGGGAATAC                          | -13.10 | -85.50 | -233.4 | 93.1  | -12.80 | 1120 |          |
| <b>Pa. PA83</b>     | 1 | Consensus | GTTCACTGCCGTATAGGCAGCTAAGAAA                           | -8.50  | -96.80 | -284.7 | 66.8  | -8.60  | 436  | -446.70  |
|                     |   | Variant   | GTTCACTGCCGTATAGGCAGT <u>T</u> AAGAAA                  | -10.70 | -76.80 | -213.1 | 87.2  | -9.80  | 682  |          |
|                     | 2 | Consensus | GTTCACTGCCGTATAGGCAGCTAAGAAA                           | -8.50  | -96.80 | -284.7 | 66.8  | -8.60  | 436  | -616.00  |
|                     |   | Variant   | GTTCACTGCCGTATAGGCAGCTAA <u>AAAA</u>                   | -8.40  | -59.10 | -163.4 | 88.3  | -8.60  | 315  |          |
|                     |   | Variant   | <u>TTT</u> CACTGCC <u>AC</u> ATAGG <u>TCGT</u> CAAGAAA | -4.70  | -57.50 | -170.2 | 64.6  | -2.70  | 762  |          |
|                     | 3 | Consensus | TTTCTTAGCTGCCTACACGGCAGTGAAC                           | -10.40 | -68.80 | -188.2 | 92.2  | -9.10  | 1084 | -728.80  |

|                        |   |           |                                                                 |        |        |        |      |        |      |         |
|------------------------|---|-----------|-----------------------------------------------------------------|--------|--------|--------|------|--------|------|---------|
|                        |   | Variant   | TTTCTTAGCTGCCTACACG <u>A</u> CAGTGAAC                           | -2.90  | -42.20 | -126.7 | 59.8 | -2.10  | 484  |         |
| <b>Pa. L10</b>         | 1 | Consensus | GTTCACTGCCGTATAGGCAGCTAAGAAA                                    | -8.50  | -96.80 | -284.7 | 66.8 | -8.60  | 436  | -375.70 |
|                        |   | Variant   | GTTCACTGCCGTATAGGCAT <u>TAGGCAGCT</u>                           | -7.40  | -59.10 | -166.6 | 81.3 | -2.70  | 801  |         |
|                        |   | Variant   | <u>T</u> TTCACTGCC <u>A</u> CATAGG <u>T</u> CGT <u>C</u> AAGAAA | -4.70  | -57.50 | -170.2 | 64.6 | -9.10  | 762  |         |
|                        | 2 | Consensus | TTTCTTAGCTGCCTACACGGCAGTGAAC                                    | -10.40 | -68.80 | -188.2 | 92.2 | -9.10  | 1084 | -484.40 |
| <b>Pa. 12939</b>       | 1 | Consensus | TTTCTTAGCTGCCTACACGGCAGTGAAC                                    | -10.40 | -68.80 | -188.2 | 92.2 | -12.80 | 1084 | -452.40 |
| <b>Pa. PB368</b>       | 1 | Consensus | CGGTTCATCCCCACGCACGTGGGGGAACAC                                  | -13.00 | -85.40 | -233.4 | 92.6 | -12.80 | 879  | -910.50 |
|                        |   | Variant   | <u>T</u> GGTTCATCCCCACGCACGTGGGGGAACAC                          | -13.00 | -85.40 | -233.4 | 92.6 | -12.80 | 1377 |         |
|                        | 2 | Consensus | CGGTTCATCCCCACACCCGTGGGGGAACAC                                  | -13.10 | -85.50 | -233.4 | 93.1 | -12.80 | 1002 | -537.60 |
| <b>Pa. F5677</b>       | 1 | Consensus | CGGTTCATCCCCACGCATGTGGGGGAACAC                                  | -13.00 | -85.40 | -233.4 | 92.6 | -12.80 | 1133 | -428.10 |
|                        |   | Variant   | <u>C</u> AGTTCATCCCCACGCATGTGGGGGAACAC                          | -13.00 | -85.40 | -233.4 | 92.6 | -12.80 | 1041 |         |
|                        | 2 | Consensus | CGGTTCATCCCCACACCCGTGGGGGAACAC                                  | -13.10 | -85.50 | -233.4 | 93.1 | -12.80 | 233  | -437.00 |
|                        |   | Variant   | <u>C</u> AG <u>T</u> CATCCCCAC <u>G</u> CCCGTGGGGGAACAC         | -13.00 | -85.40 | -233.4 | 92.6 | -12.80 | 1120 |         |
|                        |   | Variant   | CGGTTCATCCCCACACCCGTGGGGGAAT <u>A</u> C                         | -13.10 | -85.50 | -233.4 | 93.1 | -12.80 | 1120 |         |
|                        |   | Variant   | <u>G</u> GGTTCATCCCCACACCCGTGGGGGAACAC                          | -13.10 | -85.50 | -233.4 | 93.1 | -12.80 | 1169 |         |
|                        |   | Variant   | <u>G</u> GTTC <u>A</u> CCCC <u>A</u> ACACCCGTGGGGGAACAC         | -8.60  | -60.50 | -167.3 | 88.3 | -7.80  | 876  |         |
| <b>Pa. AR_0360</b>     | 1 | Consensus | GTTCACTGCCGTATAGGCAGCTAAGAAA                                    | -8.50  | -96.80 | -284.7 | 66.8 | -8.60  | 436  | -311.10 |
|                        |   | Variant   | GTTCACTGCCGTATAGGCAG <u>T</u> TAAGAAA                           | -10.70 | -76.80 | -213.1 | 87.2 | -9.80  | 682  |         |
|                        | 2 | Consensus | GTTCACTGCCGTATAGGCAGCTAAGAAA                                    | -8.50  | -96.80 | -284.7 | 66.8 | -8.60  | 436  | -360.70 |
|                        |   | Variant   | GTTCACTGCCGTATAGGCAGCTAA <u>A</u> AAA                           | -8.40  | -59.10 | -163.4 | 88.3 | -8.60  | 315  |         |
|                        |   | Variant   | <u>T</u> TTCACTGCC <u>A</u> CATAGG <u>T</u> CGT <u>C</u> AAGAAA | -4.70  | -57.50 | -170.2 | 64.6 | -2.70  | 762  |         |
|                        | 3 | Consensus | TTTCTTAGCTGCCTACACGGCAGTGAAC                                    | -10.40 | -68.80 | -188.2 | 92.2 | -9.10  | 1084 | -640.00 |
| <b>Pa. AR444</b>       | 1 | Consensus | GTTCACTGCCGTGTAGGCAGCTAAGAAA                                    | -8.50  | -96.80 | -284.7 | 66.8 | -8.60  | 695  | -676.50 |
|                        |   | Variant   | GTTCACTG <u>T</u> CGTGTAGGCAGCTAAGAAA                           | -5.70  | -85.40 | -256.9 | 59.1 | -5.90  | 715  |         |
|                        | 2 | Consensus | TTTCTTAGCTGCCTATACGGCAGTGAAC                                    | -10.40 | -68.80 | -188.2 | 92.2 | -9.10  | 1117 | -620.30 |
|                        |   | Variant   | TTTCTT <u>G</u> AC <u>G</u> ACCTAT <u>G</u> TGGCAGTGA <u>A</u>  | -2.20  | -53.40 | -165   | 50.3 | -4.40  | 1535 |         |
|                        |   | Variant   | TTTT <u>T</u> TAGCTGCCTATACGGCAGTGAAC                           | -10.40 | -68.80 | -188.2 | 92.2 | -9.10  | 1538 |         |
|                        | 3 | Consensus | TTTCTTAGCTGCCTATACGGCAGTGAAC                                    | -10.40 | -68.80 | -188.2 | 92.2 | -9.10  | 1117 | -463.90 |
|                        |   | Variant   | TTTCTTA <u>A</u> CTGCCTATACGGCAGTGAAC                           | -10.00 | -67.90 | -186.6 | 90.5 | -9.40  | 868  |         |
| <b>Pa. DK1 substr.</b> | 1 | Consensus | GTTCACTGCCGTATAGGCAGCTAAGAAA                                    | -8.50  | -96.80 | -284.7 | 66.8 | -8.60  | 436  | -443.00 |
| <b>NH57388A</b>        |   | Variant   | GTTCACTGCCGTATAGGCAGCTAA <u>A</u> AAA                           | -8.40  | -59.10 | -163.4 | 88.3 | -8.60  | 315  |         |
|                        |   | Variant   | <u>T</u> TTCACTGCC <u>A</u> CATAGG <u>T</u> CGT <u>C</u> AAGAAA | -4.70  | -57.50 | -170.2 | 64.6 | -2.70  | 762  |         |
|                        | 2 | Consensus | TTTCTTAGCTGCCTACACGGCAGTGAAC                                    | -10.40 | -68.80 | -188.2 | 92.2 | -9.10  | 1084 | -503.80 |
|                        |   | Variant   | TTTCTTAGCTGCCTACT <u>C</u> GGCAGTGAAC                           | -10.40 | -68.80 | -188.2 | 92.2 | -9.10  | 1054 |         |
|                        | 3 | Consensus | CGGTTCATCCCCACGCATGTGGGGGAACAC                                  | -13.00 | -85.40 | -233.4 | 92.6 | -12.80 | 1133 | -564.60 |
|                        |   | Variant   | CGGTTCATCCCCACGCATGT <u>A</u> GGGAACAC                          | -7.50  | -62.70 | -177.9 | 79.1 | -6.20  | 435  |         |
|                        | 4 | Consensus | CGGTTCATCCCCACACCCGTGGGGGAACAC                                  | -13.10 | -85.50 | -233.4 | 93.1 | -12.80 | 1002 | -456.60 |
|                        |   | Variant   | <u>C</u> AG <u>T</u> CATCCCCAC <u>G</u> CCCGTGGGGGAACAC         | -13.00 | -85.40 | -233.4 | 92.6 | -12.80 | 233  |         |
|                        |   | Variant   | <u>C</u> AG <u>G</u> TTATCCAC <u>G</u> CCGTGGGGGAACAT           | -9.70  | -90.20 | -259.5 | 74.3 | -9.30  | 1127 |         |
| <b>Pa. SCVJan</b>      | 1 | Consensus | GTTCACTGCCGTATAGGCAGCTAAGAAA                                    | -8.50  | -96.80 | -284.7 | 66.8 | -2.70  | 436  | -368.90 |
|                        |   | Variant   | GTTCACTGCCGTATAGGCAGCTAA <u>A</u> AAA                           | -8.40  | -59.10 | -163.4 | 88.3 | -8.60  | 315  |         |
|                        |   | Variant   | <u>T</u> TTCACTGCC <u>A</u> CATAGG <u>T</u> CGT <u>C</u> AAGAAA | -4.70  | -57.50 | -170.2 | 64.6 | -2.70  | 762  |         |
|                        | 2 | Consensus | TTTCTTAGCTGCCTACACGGCAGTGAAC                                    | -10.40 | -68.80 | -188.2 | 92.2 | -9.10  | 1084 | -503.80 |
|                        |   | Variant   | TTTCTTAGCTGCCTACT <u>C</u> GGCAGTGAAC                           | -10.40 | -68.80 | -188.2 | 92.2 | -9.10  | 1054 |         |
|                        | 3 | Consensus | CGGTTCATCCCCACGCATGTGGGGGAACAC                                  | -13.00 | -85.40 | -233.4 | 92.6 | -12.80 | 1133 | -564.60 |
|                        |   | Variant   | CGGTTCATCCCCACGCATGT <u>A</u> GGGAACAC                          | -7.50  | -62.70 | -177.9 | 79.1 | -6.20  | 435  |         |
|                        | 4 | Consensus | CGGTTCATCCCCACACCCGTGGGGGAACAC                                  | -13.10 | -85.50 | -233.4 | 93.1 | -12.80 | 1002 | -456.60 |
|                        |   | Variant   | CAG <u>T</u> CATCCCCAC <u>G</u> CCCGTGGGGGAACAC                 | -13.00 | -85.40 | -233.4 | 92.6 | -12.80 | 233  |         |



|                      |   |           |                                                                                    |        |         |        |       |        |      |          |
|----------------------|---|-----------|------------------------------------------------------------------------------------|--------|---------|--------|-------|--------|------|----------|
|                      |   | Variant   | CAG <u>GTTTAT</u> CCCACG <u>CC</u> TGTGGGGAACAT                                    | -9.70  | -90.20  | -259.5 | 74.3  | -9.30  | 1127 |          |
| <b>Pa. Nh muc</b>    | 1 | Consensus | CGGTTCATCCCCACACCCGTGGGGAACAC                                                      | -13.10 | -85.50  | -233.4 | 93.1  | -12.80 | 1002 | -456.60  |
|                      |   | Variant   | CAG <u>CT</u> CATCCCCACG <u>CC</u> CGTGGGGAACAC                                    | -13.00 | -85.40  | -233.4 | 92.6  | -12.80 | 233  |          |
|                      |   | Variant   | CAG <u>GTTTAT</u> CCCACG <u>CC</u> TGTGGGGAACAT                                    | -9.70  | -90.20  | -259.5 | 74.3  | -9.30  | 1127 |          |
|                      | 2 | Consensus | CGGTTCATCCCCACGCATGTGGGGAACAC                                                      | -13.00 | -85.40  | -233.4 | 92.6  | -12.80 | 1133 | -564.60  |
|                      |   | Variant   | CGGTTCATCCCCACGCATGT <u>A</u> GGGAACAC                                             | -7.50  | -62.70  | -177.9 | 79.1  | -6.20  | 435  |          |
|                      | 3 | Consensus | GTTCACTGCCGTATAGGCAGCTAAGAAA                                                       | -8.50  | -96.80  | -284.7 | 66.8  | -8.60  | 436  | -368.90  |
|                      |   | Variant   | GTTCACTGCCGTATAGGCAGCTAA <u>A</u> AAA                                              | -8.40  | -59.10  | -163.4 | 88.3  | -2.70  | 315  |          |
|                      |   | Variant   | <u>T</u> TTCACTGCC <u>A</u> CATAGG <u>T</u> C <u>G</u> T <u>C</u> AAGAAA           | -4.70  | -57.50  | -170.2 | 64.6  | -2.70  | 762  |          |
|                      | 4 | Consensus | TTTCTTAGCTGCCTACACGGCAGTGAAC                                                       | -10.40 | -68.80  | -188.2 | 92.2  | -9.10  | 1084 | -503.80  |
|                      |   | Variant   | TTTCTTAGCTGCCTACT <u>C</u> GGCAGTGAAC                                              | -10.40 | -68.80  | -188.2 | 92.2  | -9.10  | 1054 |          |
| <b>Pa. RW109</b>     | 1 | Consensus | CGGTTCATCCCCACGCATGTGGGGAACAC                                                      | -13.00 | -85.40  | -233.4 | 92.6  | -12.80 | 1133 | -334.80  |
|                      |   | Variant   | CGGTTCATCCCCACGCATGT <u>A</u> GGGAACAC                                             | -7.50  | -62.70  | -177.9 | 79.1  | -6.20  | 435  |          |
|                      | 2 | Consensus | CGGTTCATCCCCACACCCGTGGGGAACAC                                                      | -13.10 | -85.50  | -233.4 | 93.1  | -12.80 | 1002 | -437.00  |
|                      |   | Variant   | C <u>A</u> G <u>C</u> TCATCCCCACG <u>CC</u> CGTGGGGAACAC                           | -13.00 | -85.40  | -233.4 | 92.6  | -12.80 | 233  |          |
|                      |   | Variant   | <u>G</u> G <u>T</u> T <u>C</u> A <u>C</u> C <u>C</u> C <u>C</u> AACACCCGTGGGGAACAC | -8.60  | -60.50  | -167.3 | 88.3  | -7.80  | 876  |          |
|                      |   | Variant   | CGGTTCATCCCCACACCCGTGGGGAAT <u>A</u> C                                             | -13.10 | -85.50  | -233.4 | 93.1  | -12.80 | 1120 |          |
|                      |   | Variant   | <u>G</u> GGTTCATCCCCACACCCGTGGGGAACAC                                              | -13.10 | -85.50  | -233.4 | 93.1  | -12.80 | 1169 |          |
| <b>Pp. KF715</b>     | 1 | Consensus | CCGCTCACCCCGCGCACGCGGGAAATAC                                                       | -9.60  | -63.40  | -173.4 | 92.3  | -9.80  | 113  | -275.30  |
|                      |   | Variant   | CCGCT <u>T</u> ACCCCGCGCACGCGGGAAATAC                                              | -9.60  | -63.40  | -173.4 | 92.3  | -9.80  | 251  |          |
| <b>Ps. A1501</b>     | 1 | Consensus | GTCGCGCCCCACGCGGGCGGTGGATTGAAAC                                                    | -14.00 | -78.30  | -207.3 | 104.5 | -14.30 | 3339 | -1422.00 |
|                      |   | Variant   | GTCGCGCCCCACGCGGG <u>A</u> GCGTGGATTGAAAC                                          | -13.00 | -90.00  | -248.2 | 89.3  | -13.50 | 2424 |          |
| <b>Pc. JD37</b>      | 1 | Consensus | TTTCTAAGCTGCCTACACGGCAGTGAAG                                                       | -10.40 | -68.80  | -188.2 | 92.2  | -9.90  | 1452 | -271.70  |
|                      |   | Variant   | TTTCTAAGCTGCCTA <u>T</u> ACGGCAGTGAAG                                              | -10.40 | -68.80  | -188.2 | 92.2  | -9.90  | 1506 |          |
|                      | 2 | Consensus | TTTTCTAAGCTGCCTATTCGGCAGTGAAC                                                      | -10.40 | -68.80  | -188.2 | 92.2  | -9.10  | 1534 | -191.60  |
|                      |   | Variant   | <u>C</u> TTTCTAAGCTGCCTAT <u>C</u> GGCAGTGAAC                                      | -10.40 | -68.80  | -188.2 | 92.2  | -9.10  | 858  |          |
|                      |   | Variant   | TTTTCTAAGCTGCCTAT <u>C</u> GGCAGTGAAC                                              | -10.40 | -68.80  | -188.2 | 92.2  | -9.10  | 1239 |          |
| <b>Pm. Ymp</b>       | 1 | Consensus | CGGTTCATCCCCGCTGGCGCGGGGAACAC                                                      | -14.10 | -84.90  | -228.2 | 98.7  | -14.20 | 1369 | -1264.90 |
|                      |   | Variant   | CGGTTCATCCCCGCTGGCGCGGG <u>AACACG</u>                                              | -9.20  | -61.40  | -168.3 | 91.6  | -9.70  | 1308 |          |
|                      |   | Variant   | <u>CTCGA</u> CATCCCCGCTGGCGCGGGGAACAC                                              | -14.10 | -84.90  | -228.2 | 98.7  | -14.20 | 402  |          |
|                      |   | Variant   | <u>T</u> GGTTCATCCCCGCTGGCGCGGGGAACAC                                              | -14.10 | -84.90  | -228.2 | 98.7  | -14.20 | 2124 |          |
|                      | 2 | Consensus | CGGTTCATCCCCGCTGGCGCGGGGAACAC                                                      | -14.10 | -84.90  | -228.2 | 98.7  | -14.20 | 1369 | -581.50  |
|                      |   | Variant   | <u>T</u> TT <u>C</u> CATCCCCG <u>CAT</u> GTGCAGGGGAACAC                            | -8.80  | -67.60  | -189.5 | 83.4  | -8.10  | 687  |          |
| <b>Pps. CECT5344</b> | 1 | Consensus | GTGTTCCCCGCGCCAGCGGGGATGAACCG                                                      | -15.10 | -102.90 | -283   | 90.3  | -15.20 | 2248 | -1256.20 |
|                      |   | Variant   | GTGTTCCCCGCGCCAGC <u>A</u> GGGATGAACCG                                             | -9.40  | -82.70  | -236.3 | 76.7  | -9.00  | 862  |          |
|                      |   | Variant   | GTGTTCCCCGCGCCAGCGGGGATGAAC <u>C</u> A                                             | -15.10 | -102.90 | -283   | 90.3  | -15.20 | 2199 |          |
|                      |   | Variant   | GTGTTCCCCGCGCCAGCGGGGATGAAC <u>C</u>                                               | -15.10 | -102.90 | -283   | 90.3  | -15.20 | 1740 |          |
|                      |   | Variant   | GTGTTCCCCGCGCCAGCGGGGATGAAC <u>C</u> T                                             | -15.10 | -102.90 | -283   | 90.3  | -15.20 | 1762 |          |
|                      | 2 | Consensus | GTGTTCCCCGCGCCAGCGGGGATGAACCG                                                      | -15.10 | -102.90 | -283   | 90.3  | -15.20 | 2248 | -1930.30 |
|                      |   | Variant   | GTGTTCCCCGCGCCAGCGGGGATGA <u>G</u> CTT                                             | -15.50 | -108.60 | -300.1 | 88.6  | -15.90 | 1909 |          |
|                      |   | Variant   | GTGTTCCCCGCGCC <u>T</u> GCGGGGATGAACCG                                             | -14.90 | -102.90 | -283.7 | 89.5  | -14.40 | 2802 |          |
|                      |   | Variant   | GTG <u>C</u> TCCCCGCGCCAGCGGGGATGAACCG                                             | -14.30 | -83.80  | -224   | 100.8 | -15.10 | 1187 |          |
|                      |   | Variant   | GTGTTCCCCGCGCCAGCGGGGATGAAC <u>C</u>                                               | -15.10 | -102.90 | -283   | 90.3  | -15.20 | 1740 |          |
|                      | 3 | Consensus | CTTCACTGCCGTGTAGGCAGCTCAGAAA                                                       | -8.80  | -84.50  | -244   | 73    | -8.60  | 704  | -1012.90 |
|                      |   | Variant   | CTTCACTGCCGT <u>A</u> TAGGCAGC <u>CCGCCAC</u>                                      | -8.40  | -59.10  | -163.4 | 88.3  | -8.60  | 131  |          |
|                      |   | Variant   | CTTCACTGCCG <u>AG</u> TAGGCAGCTCAG <u>C</u> AA                                     | -8.40  | -59.10  | -163.4 | 88.3  | -8.60  | 552  |          |
|                      | 4 | Consensus | GTTCACTGCCGTGTAGGCAGCTCAGAAA                                                       | -8.50  | -96.80  | -284.7 | 66.8  | -8.60  | 681  | -878.30  |
|                      |   | Variant   | GTTCACTGCCGTGTAGGCAGC <u>AATTG</u> C                                               | -8.40  | -59.10  | -163.4 | 88.3  | -8.60  | 1268 |          |

|                    |                     |           |                                                |        |        |        |      |        |      |          |
|--------------------|---------------------|-----------|------------------------------------------------|--------|--------|--------|------|--------|------|----------|
| <i>Pal. JAB1</i>   | 1                   | Consensus | CTTCACTGCCGAGTAGGCAGCTCAGAGA                   | -8.40  | -59.10 | -163.4 | 88.3 | -8.60  | 1098 | -379.70  |
|                    |                     | Variant   | CTTCACTGCCGAGTAGGCAGC <b>CCCACAC</b>           | -8.40  | -59.10 | -163.4 | 88.3 | -8.60  | 184  |          |
|                    | 2                   | Consensus | GTTCACTGCCGTGTAGGCAGCTCAGAAA                   | -8.50  | -96.80 | -284.7 | 66.8 | -8.60  | 681  | -489.30  |
|                    |                     | Variant   | GTTCACTGCCGTGTAGGCAGC <b>AATTGTC</b>           | -8.40  | -59.10 | -163.4 | 88.3 | -8.60  | 1268 |          |
| <i>Pb. DSM6083</i> | 1                   | Consensus | CGGTTCATCCCCGCGCCTGCGGGGAACGC                  | -14.50 | -86.90 | -233.4 | 99.1 | -14.30 | 1829 | -2235.00 |
|                    |                     | Variant   | <b>GAAT</b> TTCATCCCCGCGCCTGCGGGGAACGC         | -14.50 | -86.90 | -233.4 | 99.1 | -14.30 | 584  |          |
|                    |                     | Variant   | <b>TGGT</b> TTCATCCCCGCGCCTGCGGGGAACGC         | -14.50 | -86.90 | -233.4 | 99.1 | -14.30 | 1997 |          |
|                    |                     | Variant   | CGGTTCATCCCC <b>A</b> CGCCTGCGGGGAACGC         | -9.00  | -64.80 | -179.9 | 87   | -8.60  | 1069 |          |
|                    |                     | Variant   | CGGTTCAT <b>T</b> CCCCGCGCCTGCGGGGAACGC        | -11.80 | -70.30 | -188.6 | 99.5 | -12.20 | 2079 |          |
|                    | 2                   | Consensus | CGGTTCATCCCCGCGCCTGCGGGGAACAC                  | -14.50 | -86.90 | -233.4 | 99.1 | -14.30 | 1128 | -232.00  |
|                    |                     | Consensus | TTTCTGAGCTGCCTACACGGCAGTGAAC                   | -10.40 | -68.80 | -188.2 | 92.2 | -9.10  | 1086 | -422.50  |
|                    | <i>Ppa. CRS01-1</i> | Variant   | TTTCTGA <b>A</b> TCCTACACGGCAGTGAAC            | -10.00 | -67.90 | -186.6 | 90.5 | -9.40  | 897  |          |
|                    |                     | Variant   | TTTCTGAGCTGCCTA <b>A</b> ACGGCAGTGAAC          | -10.40 | -68.80 | -188.2 | 92.2 | -9.10  | 919  |          |
|                    |                     | Variant   | TTTCTG <b>GG</b> CTGCCTACA <b>A</b> GGCAGTGAAC | -10.90 | -69.00 | -187.3 | 95.1 | -9.90  | 1603 |          |
|                    | 2                   | Consensus | GTTCACTGCCGTGTAGGCAGCTCAGAAA                   | -8.50  | -96.80 | -284.7 | 66.8 | -8.60  | 681  | -884.80  |
|                    |                     | Variant   | GTTCACTGCC <b>A</b> TGTAGGCAGCTCAGAAA          | -7.80  | -97.70 | -289.8 | 63.9 | -7.80  | 546  |          |
|                    |                     | Variant   | GTTCACTGCCGTGTAGGCAG <b>T</b> TCAGAAA          | -10.30 | -89.50 | -255.3 | 77.3 | -9.80  | 994  |          |
|                    |                     | Variant   | GTTCACTGCCGTGTAGG <b>C</b> TGCTCAGAAA          | -5.20  | -43.70 | -124.1 | 78.8 | -4.50  | 844  |          |
|                    |                     | Variant   | GTTCACTG <b>T</b> CGTGTAGGCAGCTCAGAAA          | -5.70  | -85.40 | -256.9 | 59.1 | -5.90  | 703  |          |
| <i>Pci. SJTE-3</i> | 1                   | Consensus | ATTTCTTAGCTGCCTACACGGCAGTGAAG                  | -10.90 | -77.20 | -213.7 | 87.9 | -10.30 | 2061 | -416.40  |
|                    |                     | Variant   | <b>GCTT</b> TTTAGCTGCCTACACGGCAGTGAAG          | -10.40 | -68.80 | -188.2 | 92.2 | -9.40  | 2716 |          |
|                    |                     | Variant   | <b>G</b> TTTCTTAGCTGCCTACACGGCAGTGAAG          | -10.90 | -77.20 | -213.7 | 87.9 | -10.30 | 2189 |          |
|                    |                     | Variant   | <b>T</b> TTTCTTAGCTGCCTACACGGCAGTGAAG          | -10.90 | -77.20 | -213.7 | 87.9 | -10.30 | 3104 |          |
|                    | 2                   | Consensus | TTTCTTAGCTGCCTATACGGCAGTGAA                    | -10.40 | -68.80 | -188.2 | 92.2 | -9.10  | 1117 | -225.30  |
|                    |                     | Variant   | <b>GGGAAGAA</b> CTGCCTATACGGCAGTGAA            | -10.00 | -67.90 | -186.6 | 90.5 | -9.40  | 121  |          |
|                    |                     | Variant   | TTTCTTAGCTG <b>C</b> TATACGGCAGTGAA            | -9.00  | -66.30 | -184.7 | 85.7 | -6.60  | 1271 |          |
|                    |                     | Variant   | TTTCTTAGCTG <b>C</b> TATACGGCAGTGAA            | -9.00  | -66.30 | -184.7 | 85.7 | -6.60  | 1271 |          |

The values of  $\Delta G$ ,  $\Delta H$ ,  $\Delta S$  and  $T_m$  which refer to the energy of Gibbs, enthalpy, entropy and melting temperature, respectively, were calculated through the MFold, while the MFE DR, folding kinetics and MFE CRISPR were calculated using RNAFold.

3  
4  
5

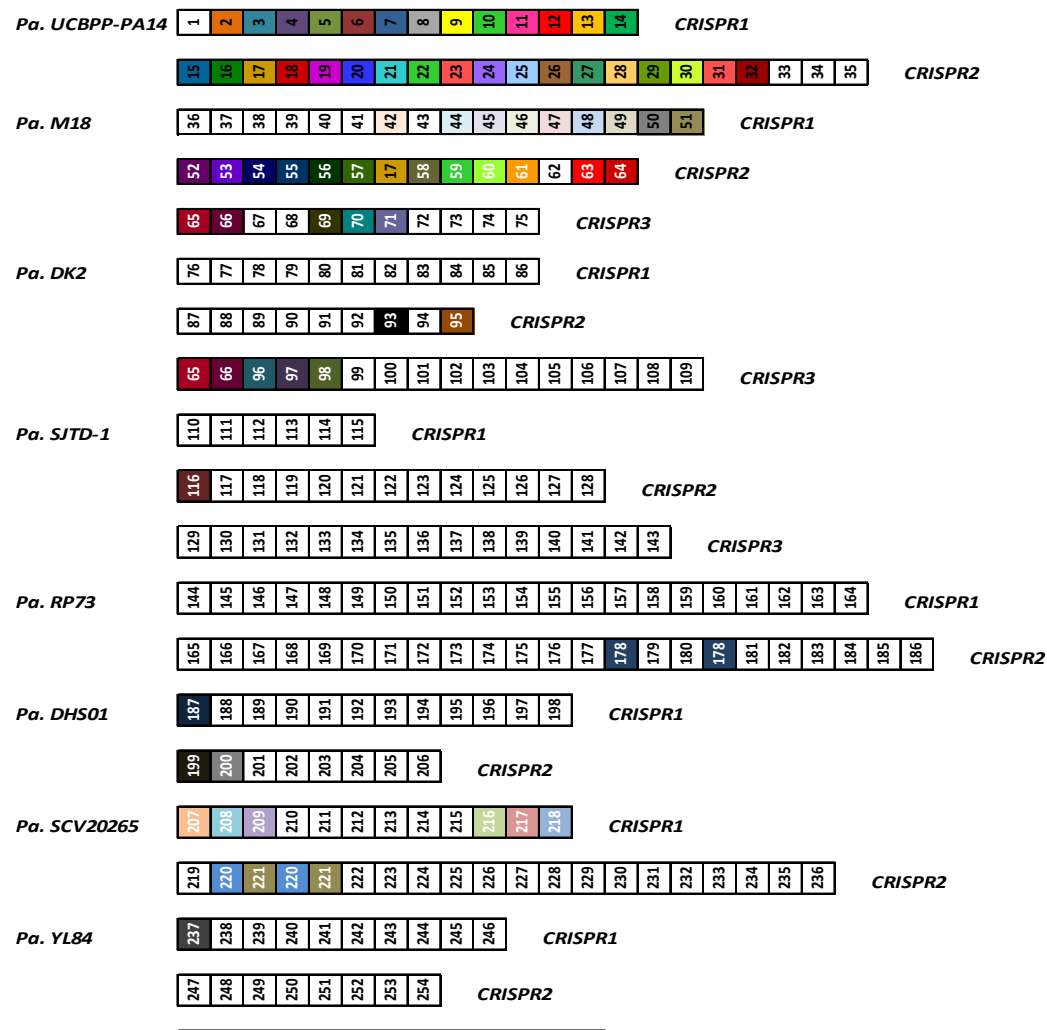

**Figure S1.** Diversity of spacer sequences. Spacers are represented by boxes; direct repeats (DR) are not included. The same number and color represents the same spacer. The white color represents a single spacer. The abbreviations *Pa*, *Pp*, *Ps*, *Pc*, *Pm*, *Pps*, *Pal*, *Pb*, *Ppa*, and *Pci* represent the abbreviations for *Pseudomonas aeruginosa*, *putida*, *stutzeri*, *chlororaphis*, *mendocina*, *pseudoalcaligenes*, *alcaliphila*, *balearica*, *parafulva*, and *citronellolis*, respectively.

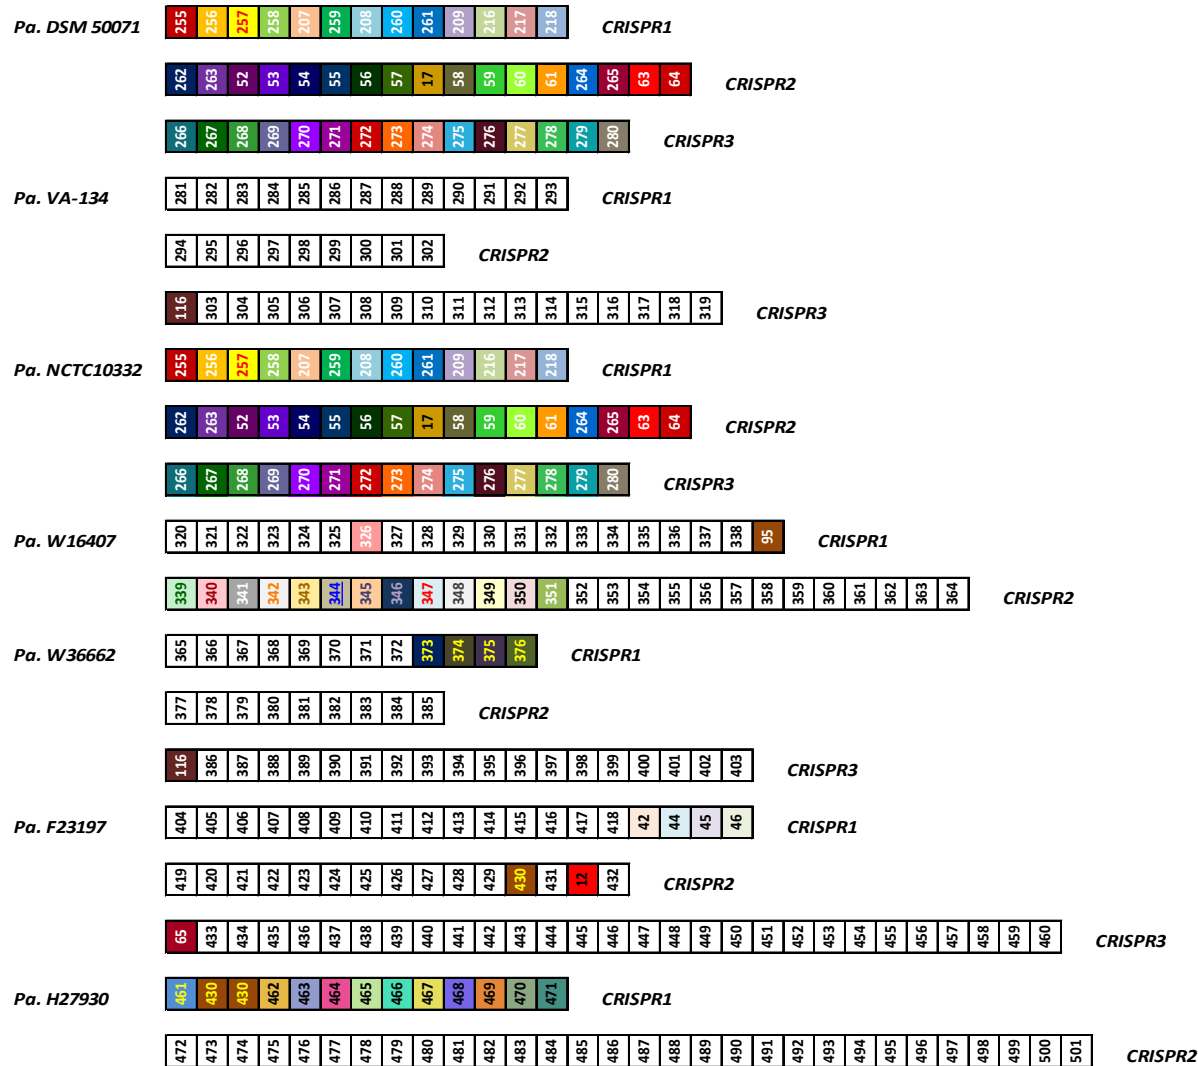

**Figure S1.** Diversity of spacer sequences. Spacers are represented by boxes; direct repeats (DR) are not included. The same number and color represents the same spacer. The white color represents a single spacer. The abbreviations *Pa*, *Pp*, *Ps*, *Pc*, *Pm*, *Pps*, *Pal*, *Pb*, *Ppa*, and *Pci* represent the abbreviations for *Pseudomonas aeruginosa*, *putida*, *stutzeri*, *chlororaphis*, *mendocina*, *pseudoalcaligenes*, *alcaliphila*, *balearica*, *parafulva*, and *citronellolis*, respectively.

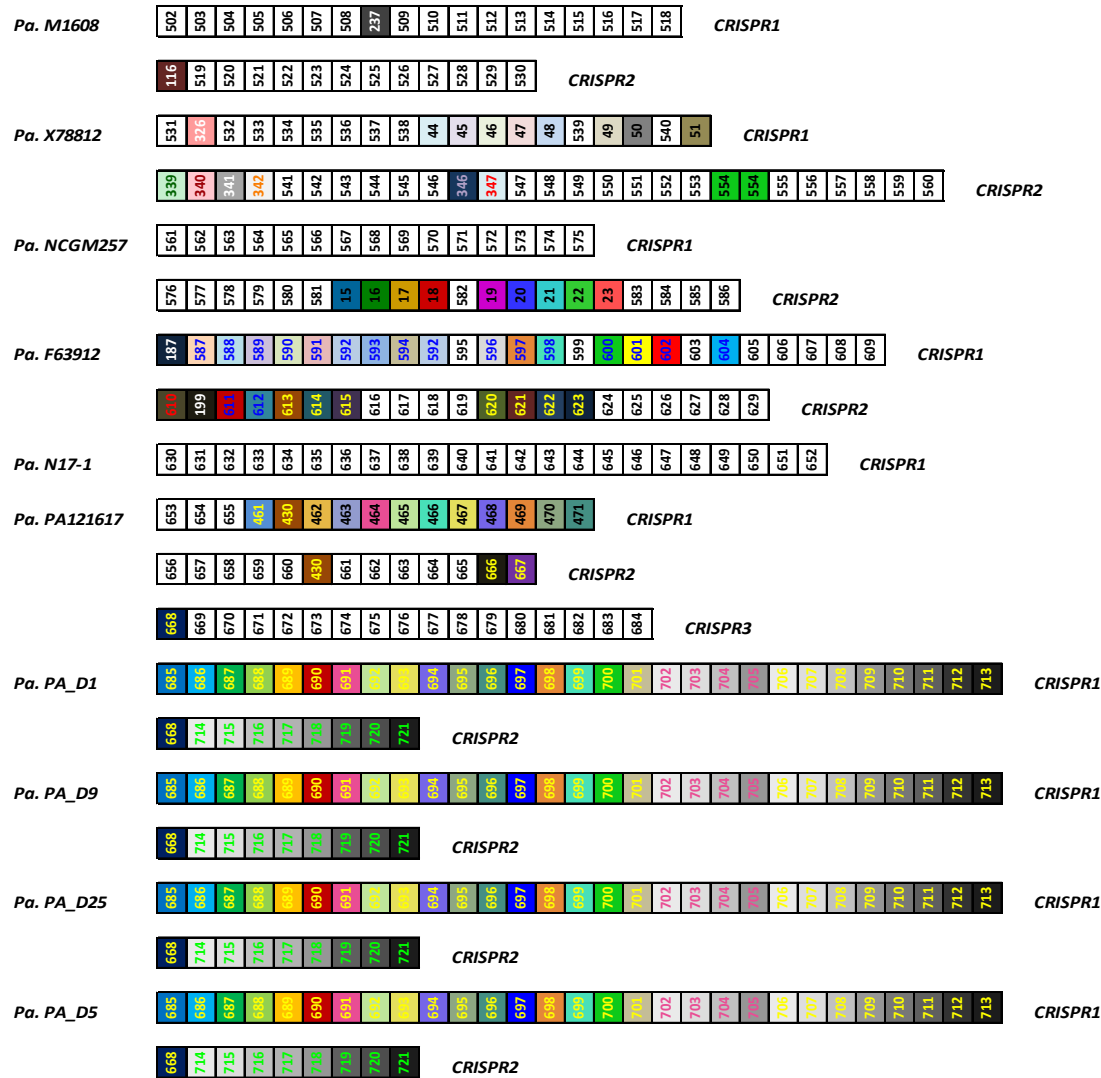

**Figure S1.** Diversity of spacer sequences. Spacers are represented by boxes; direct repeats (DR) are not included. The same number and color represents the same spacer. The white color represents a single spacer. The abbreviations *Pa*, *Pp*, *Ps*, *Pc*, *Pm*, *Pps*, *Pal*, *Pb*, *Ppa*, and *Pci* represent the abbreviations for *Pseudomonas aeruginosa*, *putida*, *stutzeri*, *chlororaphis*, *mendocina*, *pseudoalcaligenes*, *alcaliphila*, *balearica*, *parafulva*, and *citronellolis*, respectively.

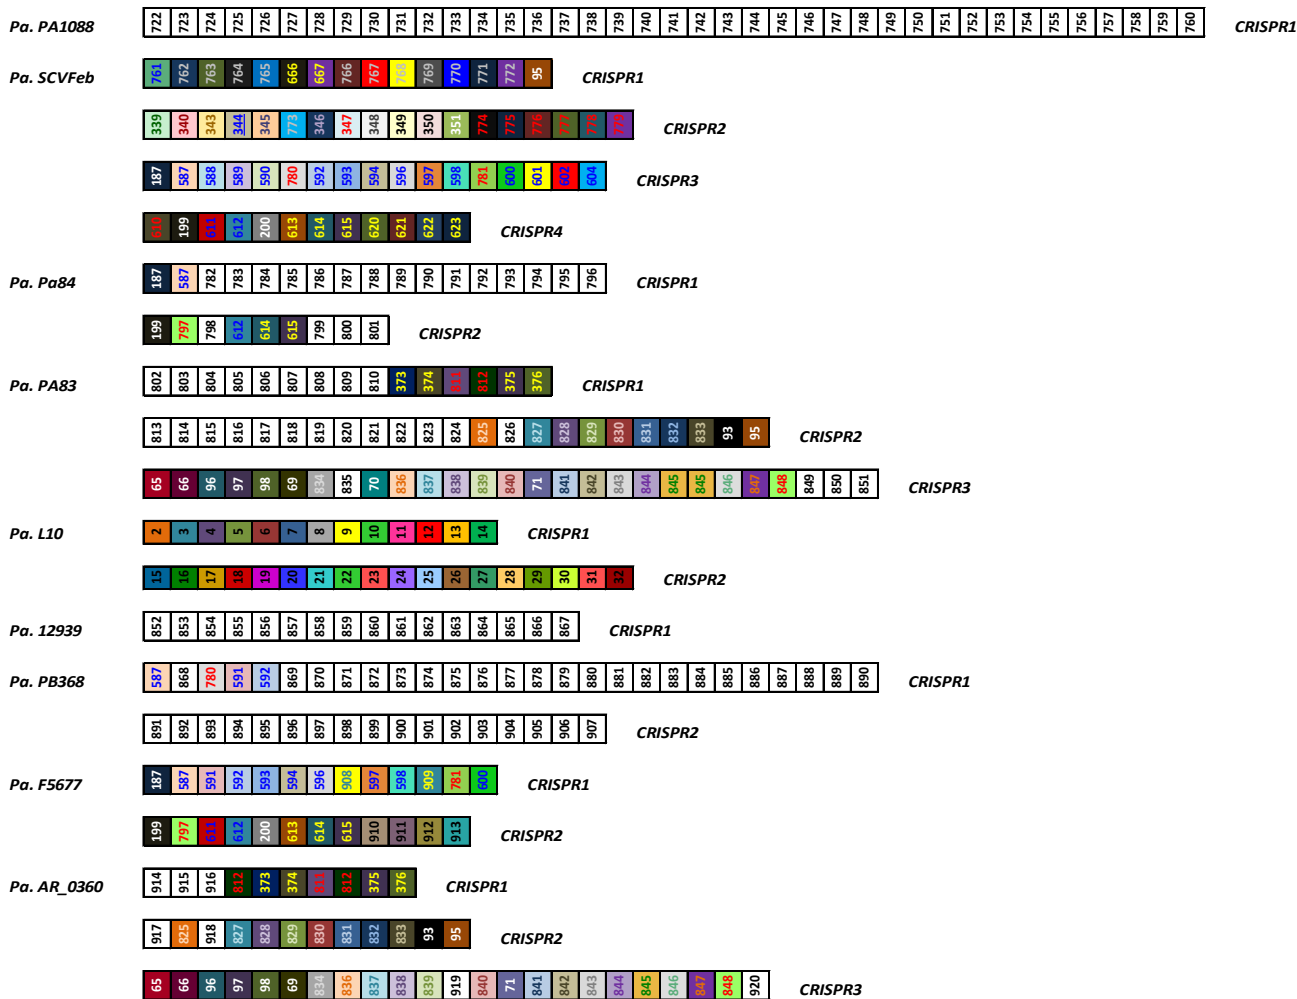

**Figure S1.** Diversity of spacer sequences. Spacers are represented by boxes; direct repeats (DR) are not included. The same number and color represent the same spacer. The white color represents a single spacer. The abbreviations *Pa*, *Pp*, *Ps*, *Pc*, *Pm*, *Pps*, *Pal*, *Pb*, *Ppa*, and *Pci* represent the abbreviations for *Pseudomonas aeruginosa*, *putida*, *stutzeri*, *chlororaphis*, *mendocina*, *pseudoalcaligenes*, *alcaliphila*, *balearica*, *parafulva*, and *citronellolis*, respectively.



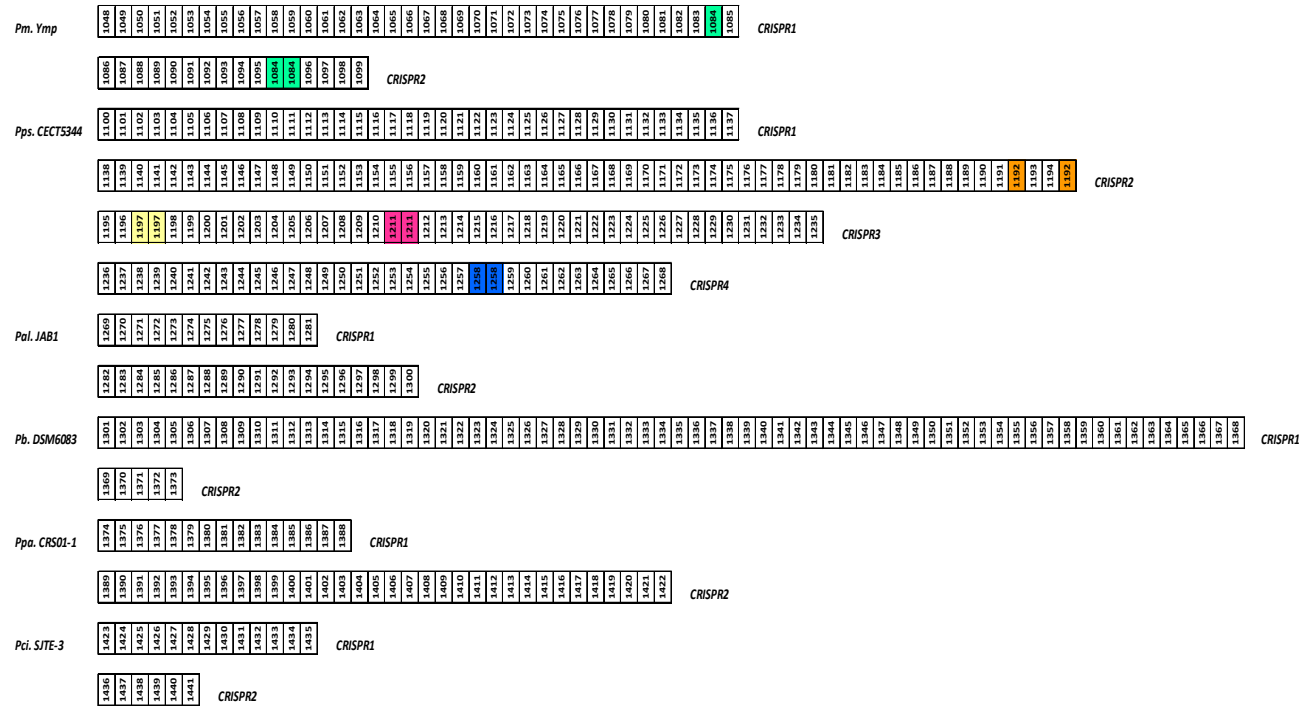

**Figure S1.** Diversity of spacer sequences. Spacers are represented by boxes; direct repeats (DR) are not included. The same number and color represents the same spacer. The white color represents a single spacer. The abbreviations Pa, Pp, Ps, Pc, Pm, Pps, Pal, Pb, Ppa, and Pci represent the abbreviations for *Pseudomonas aeruginosa*, *putida*, *stutzeri*, *chlororaphis*, *mendocina*, *pseudoalcaligenes*, *alcaliphila*, *balearica*, *parafulva*, and *citronellolis*, respectively.
